1 **Induced pluripotent stem cell derived pericytes**  
2 **respond to endogenous mediators of proliferation**  
3 **and contractility**

4 Natalie E. King<sup>1</sup>, Jo-Maree Courtney<sup>1</sup>, Lachlan S. Brown<sup>1</sup>, Alastair J. Fortune<sup>2</sup>, Nicholas B.  
5 Blackburn<sup>2</sup>, Jessica L. Fletcher<sup>2</sup>, Jake M. Cashion<sup>1</sup>, Jana Talbot<sup>3</sup>, Alice Pébay<sup>4,5</sup>, Alex W.  
6 Hewitt<sup>1,2,4,5,6</sup>, Gary P. Morris<sup>1</sup>, Kaylene M. Young<sup>2</sup>, Anthony L. Cook<sup>3</sup>, Brad A. Sutherland<sup>1</sup>

7

8 1. Tasmanian School of Medicine, College of Health and Medicine, The University of

9 Tasmania

10 2. Menzies Institute for Medical Research, The University of Tasmania, Hobart, Australia

11 3. Wicking Dementia Education and Research Centre, College of Health and Medicine, The  
12 University of Tasmania

13 4. Department of Anatomy and Physiology, The University of Melbourne

14 5. Department of Surgery, Royal Melbourne Hospital, The University of Melbourne

15 6. Centre for Eye Research Australia, Royal Victorian Eye and Ear Hospital

16

17 \*Corresponding author:

18 A/Prof. Brad A. Sutherland, [brad.sutherland@utas.edu.au](mailto:brad.sutherland@utas.edu.au)

19 Level 4, Medical Sciences Precinct, Tasmanian School of Medicine, University of Tasmania,

20 Hobart, TAS 7000, Australia

21 **Abstract**

22 **Background**

23 Pericytes are multifunctional contractile cells that reside on capillaries. Pericytes are critical  
24 regulators of cerebral blood flow and blood-brain barrier function, and pericyte dysfunction  
25 may contribute to the pathophysiology of human neurological diseases including Alzheimers  
26 disease, multiple sclerosis, and stroke. Induced pluripotent stem cell (iPSC)-derived  
27 pericytes (iPericytes) are a promising tool for vascular research. However, it is unclear how  
28 iPericytes functionally compare to primary human brain vascular pericytes (HBVPs). We  
29 differentiated iPSCs into iPericytes of either the mesoderm or neural crest lineage using  
30 established protocols. We compared iPericyte and HBVP morphologies, quantified gene  
31 expression by qPCR and bulk RNA sequencing, and visualised pericyte protein markers by  
32 immunocytochemistry. To determine whether the gene expression of neural crest  
33 iPericytes, mesoderm iPericytes or HBVPs correlated with their functional characteristics *in*  
34 *vitro*, we quantified EdU incorporation following exposure to the key pericyte mitogen,  
35 platelet derived growth factor (PDGF)-BB and, contraction and relaxation in response to the  
36 vasoconstrictor endothelin-1 or vasodilator adenosine, respectively. iPericytes were  
37 morphologically similar to HBVPs and expressed canonical pericyte markers. However,  
38 iPericytes had 1864 differentially expressed genes compared to HBVPs, while there were  
39 797 genes differentially expressed between neural crest and mesoderm iPericytes.  
40 Consistent with the ability of HBVPs to respond to PDGF-BB signalling, PDGF-BB enhanced  
41 and PDGF receptor-beta inhibitors impaired iPericyte proliferation. Administration of  
42 endothelin-1 led to iPericyte contraction and adenosine led to iPericyte relaxation, of a  
43 magnitude similar to the response evoked in HBVPs. We determined that neural crest

44 iPericytes were less susceptible to PDGFR beta inhibition, but responded most robustly to  
45 vasoconstrictive mediators. iPericytes express pericyte-associated genes and proteins and,  
46 exhibit an appropriate physiological response upon exposure to a key endogenous mitogen  
47 or vasoactive mediators. Therefore, the generation of functional iPericytes would be  
48 suitable for use in future investigations exploring pericyte function or dysfunction in  
49 neurological diseases.

## 50 **Keywords**

51 Induced pluripotent stem cells (iPSCs), pericytes, human brain vascular pericytes (HBVPs)  
52 proliferation, platelet-derived growth factor BB (PDGF-BB), platelet-derived growth factor  
53 receptor  $\beta$  (PDGFR $\beta$ ), contractility, adenosine, endothelin-1

54

## 55 **Background**

56 Pericytes are contractile cells that reside within the capillary bed. In the cerebrovasculature,  
57 pericytes are essential regulators of cerebral blood flow and contribute to blood-brain  
58 barrier formation and function (1). Pericyte dysfunction may contribute to the  
59 pathophysiology of neurological diseases including Alzheimer’s disease, stroke, and multiple  
60 sclerosis (1, 2). For example, the aggregation of amyloid- $\beta$ , a key protein associated with  
61 Alzheimer’s disease pathology, induces pericyte constriction by modulating the endothelin-1  
62 receptor signalling pathway (3). Furthermore, pericytes die during stroke, in a way that  
63 constricts capillaries and prevents tissue reperfusion even after large vessels reopen – a  
64 phenomenon known as ‘no-reflow’ (4). In addition, pericytes can also have reparative  
65 properties as it has been shown that activation of the pericyte PDGFR $\beta$  signalling pathway  
66 can facilitate repair following a stroke, by supporting fibrotic scar formation (5).

67 iPSC-derived pericytes (iPericytes) are increasingly used in place of primary pericyte lines to  
68 model pericyte function in health and disease (6-11). iPericytes have several advantages  
69 over primary pericyte lines, as they can be derived from iPSCs reprogrammed from  
70 individuals of various genetic backgrounds and disease diagnoses (12), allowing them to be  
71 used for basic biological studies as well as disease modelling or phenotyping. It is also  
72 possible to co-culture iPericytes with cells derived from the same iPSC line, to model the  
73 neurovascular unit (NVU) (13). Finally, iPericytes may be compatible with personalised  
74 medicine approaches as they could be returned to the donor without immune rejection – an  
75 approach that was recently validated in mice (14).

76 There are several published methods for iPericyte differentiation (7-11, 15). One describes a  
77 10-day method for generating iPericytes of two developmental lineages: neural crest or

78 mesoderm iPericytes (16). The iPericytes had morphological features that were consistent  
79 with primary pericyte lines and expressed key pericyte markers including PDGFR $\beta$ , alanyl  
80 aminopeptidase (CD13) and neuron-glia antigen 2 (NG2) (16). While the expression of key  
81 pericyte markers is promising, it is essential to understand the functional capacity of  
82 iPericytes relative to primary pericyte lines. iPericytes can increase endothelial cell  
83 expression of BBB markers in co-culture, improve trans-endothelial electrical resistance  
84 (TEER) and enhance the formation of 3D endothelial cell tubes (7, 9, 10, 15, 16). However,  
85 the proliferative and contractile functions of iPericytes have not been explored, and a side-  
86 by-side comparison of iPericytes and primary HBVPs is also lacking.

87 In this study, we therefore aimed to characterise the gene expression profiles, and  
88 proliferative and contractile properties of neural crest and mesoderm iPericytes and  
89 compared them to HBVPs. We compared the PDGF-BB and PDGFR $\beta$ -mediated mitogenic  
90 response of neural crest and mesoderm iPericytes, and quantified cell area change in  
91 response to the vasoconstrictor, endothelin-1 and vasodilator, adenosine. We report that  
92 iPericytes have functional PDGFR $\beta$  signalling, capable of mediating proliferation.  
93 Furthermore, iPericyte area changes in response to endothelin-1 and adenosine. iPericytes  
94 are functionally similar to HBVPs, making them suitable for use in *in vitro* assays and for  
95 disease modelling.

96

## 97 **Materials and Methods**

### 98 **Pluripotent Stem Cell Lines**

99 The TOB-00220 iPSC line (from a 67 year-old male apparently healthy donor) (17) was  
100 cultured to generate mesoderm and neural crest iPericytes with approval from the  
101 University of Tasmania Human Research Ethics Committee (Project H26563). Additional  
102 healthy control iPSC lines were used as specified in text: MNZTASi019-A (from a 53 year-old  
103 female donor); MNZTASi021-A (76 year-old male donor), and MNZTASi022-A (56 year-old  
104 female donor) were purchased from the MS Stem biobank (Menzies Institute for Medical  
105 Research, Hobart, Tasmania, Australia). MS Stem iPSCs were generated and characterised as  
106 previously described (18, 19) with approval from the University of Tasmania Human  
107 Research Ethics Committee (Project H16915). All iPSC lines were shown to have  
108 karyotypically normal karyograms within 10 passages of use for experiments and were used  
109 between passage 5-35.

### 110 **Pluripotent Stem Cell Culture**

111 iPSCs were grown on Matrigel (Merck, cat.#354277) coated plates in mTeSR+ cell culture  
112 medium (Stem Cell Technologies, cat.#05825) maintained at 37°C in a 20% O<sub>2</sub> / 5% CO<sub>2</sub>  
113 humidified incubator. The culture medium was exchanged every 2 days, and iPSCs were  
114 cultured to generate large colonies (~60- 100µm diameter) with distinct round edges. iPSC  
115 colonies were passaged using Versene Solution (Gibco, cat.#15040066).

### 116 **Differentiation of iPSCs into mesoderm or neural crest iPericytes**

117 iPSCs were differentiated to produce iPericytes by adapting a previously published protocol  
118 (16) (see Fig. S1). Induction into mesoderm iPericytes was achieved by culturing in

119 Mesoderm Induction Media (Stem Cell Technologies, cat.#05221). Induction into neural  
120 crest iPericytes was achieved by culturing in DMEM/F-12 plus GlutaMAX (ThermoFisher  
121 Scientific, cat.#10565018) supplemented with 0.5% (v/v) Bovine Serum Albumin (Sigma  
122 Aldrich, cat.#A9418), 2% (v/v) B27 (ThermoFisher Scientific, cat.#17504-044) and 3 $\mu$ M CHIR  
123 99021 (GSK3 inhibitor; Tocris Bioscience, cat.#TB4423-GMP). Medium was exchanged daily  
124 for 5 days before it was replaced with Complete Pericyte Medium (CPM, ScienCell Research  
125 Laboratories, cat.#1201), which was exchanged daily for a further 5 days. After 10-days, the  
126 resulting iPericytes were maintained as outlined below.

### 127 **Pericyte culture**

128 Human brain vascular pericytes (HBVPs, ScienCell, cat.#1200) and iPericytes were grown in  
129 CPM which was replaced every second day. Pericytes were passaged at 60%-90% confluence  
130 by washing with Dulbecco's phosphate buffered saline without magnesium or calcium  
131 (DPBS<sup>-</sup>, ThermoFisher Scientific, cat.#14190-144) prior to treatment with TrypLE Express  
132 (ThermoFisher Scientific, cat.# 12604013). Pericytes were passaged and the cells allowed to  
133 adhere for  $\geq$  16h prior to commencing experiments. All HBVPs and iPericytes were used  
134 between passage 2-8.

### 135 **Real Time qPCR**

136 To quantify the expression of pericyte-associated genes in HBVPs, iPSCs, mesoderm  
137 iPericytes or neural crest iPericytes using real time quantitative polymerase chain reaction  
138 (qPCR), cells were grown to 95% confluence in 6-well plates (Interpath, cat.#657160). Cells  
139 were collected from n = 3 wells per cell type of the same differentiation, and RNA was  
140 extracted using an RNeasy mini kit (Qiagen, cat.#74104), following the manufacturer's  
141 recommendations. RNA concentration was quantified using a NanoDrop (ND-1000,

142 Thermofisher Scientific) and RNA quality was evaluated in a subset of samples using an  
143 Agilent 4200 Tape Station system (cat.#G2991AA) with an RNA ScreenTape Ladder (Agilent,  
144 cat.#5067-5578), following the manufacturer's instructions. cDNA synthesis was performed  
145 using the High Capacity cDNA Reverse Transcription Kit (Thermofisher Scientific,  
146 cat.#4368814). For reverse transcription a SuperCycler Trinity (Kyratec, cat.#SC-200) was set  
147 to the program: step 1- 25°C, 10 min; step 2 - 37°C, 120min; step 3 - 85°C, 5 min; step 4 –  
148 4°C, infinity. 200ng of cDNA was added to the TaqMan Fast Advanced Master Mix  
149 (Thermofisher Scientific, cat.#4444557) and TaqMan primers for mRNAs of interest for each  
150 20 µL qPCR reaction. MicroAmp Optical 96 Well Reaction Plates (Thermofisher,  
151 cat.#N8010560) were placed in a QuantStudio 3 (Thermofisher Scientific, cat.#A28567)  
152 operating the following program: step 1- 50°C, 2 min; step 2 - 95°C, 2 min; step 3 - 95°C, 1  
153 sec then 60°C, 20 sec (X 40) . Raw data were exported into the QuantStudio Design and  
154 Analysis Software (v1.5.1, Applied Biosystems) to calculate Cycle threshold (Ct) values for  
155 each sample. Delta Ct values, delta delta Ct values and 2<sup>-delta delta Ct</sup> were calculated in  
156 Microsoft excel, using *HPRT1* as a housekeeping gene. Primers included: *CSPG4*  
157 (Hs00361541\_g1, Thermofisher Scientific, cat.# 4331182), *OCT4* (Hs01895061\_u1,  
158 Thermofisher Scientific, cat.# 4331182), *NANOG* (Hs04399610\_g1, Thermofisher Scientific,  
159 cat.# 4331182), *ACTA2* (Hs00426835\_g1, Thermofisher Scientific, cat. #4331182), *PDGFRB*  
160 (Hs01019589\_m1, Thermofisher Scientific, cat.# 4331182) and *HPRT1* (Hs02800695\_m1,  
161 Thermofisher Scientific, cat.# 4331182).

## 162 **Immunocytochemistry**

163 For immunocytochemical studies, HBVPs, mesoderm iPericytes and neural crest iPericytes  
164 were plated in Greiner 24 Well Plates (Interpath, cat.#662160X) and grown to 50%



165 confluency. Medium was removed and cells were fixed by immersion in ice-cold methanol  
166 (100%) for 10 min prior to washing with ice-cold PBS (Gibco, cat.#18912014). Cells were  
167 washed thrice with 0.1% (v/v) tween-20 / PBS and incubated in Serum Free Protein Block  
168 (DAKO, cat.#X0909) for 1h at 21°C. Primary antibodies (rabbit anti-CD13, Abcam Ab108310,  
169 RRID:AB\_10866195; rabbit anti-NG2, Sigma Aldrich AB5320, RRID:AB\_91789; rabbit anti-  
170 PDGFR $\beta$ , Abcam Ab32570, RRID:AB\_777165; rabbit anti- $\alpha$ SMA, Abcam Ab5694,  
171 RRID:AB\_2223021) were diluted 1:200 in Antibody Diluent (DAKO, cat.#S302283-2) and  
172 applied to cells overnight at 4°C. Cells were washed thrice in 0.1% (v/v) tween-20 / PBS  
173 before applying secondary antibody (Alexa Fluor 488-conjugated Donkey anti-rabbit,  
174 ThermoFisher Scientific, cat.# A-21206) diluted 1:1000 in Antibody Diluent for 2 h at 21°C in  
175 the dark. Cells were washed thrice in PBS and incubated with 4',6-diamidino-2-phenylindole  
176 (DAPI) (Sigma, #D9542) diluted 1:10,000 in PBS for 5 min. Cells were imaged at 10x using a  
177 Cytation 5 Cell Imaging Multi-Mode Reader (Biotek, USA).

#### 178 **RNA sequencing, data processing and differential gene expression analysis**

179 Samples containing > 10 ng/ $\mu$ l RNA with a RIN of > 8 were sent to the Australian Genome  
180 Research Facility for bulk RNA sequencing. Libraries were generated using an Illumina  
181 Stranded mRNA workflow with polyA capture. RNA sequencing, processing of raw  
182 sequencing data, and quantification of gene expression are described in the supplementary  
183 methods. Differential gene analysis, principal components analysis (PCA), gene ontology  
184 analysis and heatmap generation were performed using DESeq2 and other tools as  
185 described in supplementary methods.

#### 186 **Proliferation Assay**

187 An EdU assay was used, as described previously (20), to quantify proliferation in mesoderm  
188 or neural crest iPericytes compared to HBVPs. Briefly, pericytes were plated in 96 well plates  
189 (Interpath, cat.#655180) and grown to 50% confluency (~5,000 cells per well). CPM was  
190 replaced with either: CPM containing the complete array of pericyte growth factors,  
191 incomplete pericyte media (PM) which did not contain any growth factors, PM  
192 supplemented with 100 ng/mL PDGF-BB (Sigma Aldrich, SRP3138) or PM supplemented with  
193 100 ng/mL PDGF-BB with either 0.1  $\mu$ M, 10  $\mu$ M or 100  $\mu$ M imatinib (Sapphire Bioscience,  
194 00022120). Pericytes were cultured for 24 h prior to fixation by immersion in 4% (w/v) PFA  
195 in PBS for 15 mins at 21°C. EdU incorporation into the DNA was revealed using a Click-iT EdU  
196 Cell Proliferation Kit (Invitrogen, cat.#C10340) following the manufacturer’s instructions,  
197 and the nuclei of all cells were identified by staining with DAPI. EdU and DAPI labelling was  
198 visualised and imaged at 20x magnification using a Nikon Ti2 SRRF microscope. A region of  
199 interest spanning 3 mm<sup>2</sup> (20x magnification, 3x3) was defined, imaged and stitched to  
200 create a single image spanning the region of interest for quantification. QuPath V0.2.3 was  
201 used to identify total cells from the DAPI channel as well as proliferative cells from the EdU  
202 channel using techniques previously described (21). Briefly, channel colours (DAPI, EdU)  
203 were set for all images as a batch using the script “Channels and colours.groovy”, described  
204 previously (21). The rectangle annotation tool was used to draw a ROI around each image  
205 using the script “Select all ROI.groovy”. DAPI and EdU positive cells were detected using the  
206 Positive Cell Detection tool using the script “EDU Analysis”. Proliferation was calculated as:

$$207 \quad \% \text{ EdU positive cells} = \left( \frac{\text{EdU positive cells}}{\text{DAPI positive cells}} \right) \times 100.$$

## 208 **Contraction Assay**

209 An xCelligence Real-Time cell analysis electrical impedance assay was used, as previously  
210 published (22), to quantify contractility in mesoderm or neural crest iPericytes compared to  
211 HBVPs. 5,000 pericytes were plated in each well of an E-Plate (ACEA Biosciences, cat.#  
212 05469830001), with 200  $\mu$ L of CPM. After  $\sim$ 16 h, cells were above 50% confluence and CPM  
213 was replaced with CPM alone (control) or CPM containing 50 nM endothelin-1 or 10  $\mu$ M  
214 adenosine, concentrations as used previously (22, 23) ( $n = 4$  wells per condition) and the  
215 plate was placed in the xCelligence system. The xCelligence system measures the relative  
216 impedance of electron flow expressed as arbitrary 'cell index' units as an indicator of cell  
217 area (Fig. S4). Cell index was measured every minute for 2 h at 37°C and 5% CO<sub>2</sub>. The  
218 normalised cell index value was calculated by normalising the raw cell index values to the  
219 cell index value at baseline  $t=0$  as described previously (24). Area under the curve (AUC)  
220 was calculated using GraphPad prism for the normalised cell index graphed over the first 20  
221 mins following drug exposure. Change ( $\Delta$ ) in cell index was calculated at the maximum  
222 point of contraction in each well (Maximum  $\Delta$  Cell Index) using the equation:

$$223 \quad \text{Max } \Delta \text{ Cell Index} = \text{baseline cell index (1)} - \text{cell index at maximum contraction}$$

224 Change in cell index was also calculated after 2h ( $\Delta$  Cell index after 2 h) to determine the  
225 maintenance of contraction after 2 h using the equation:

$$226 \quad \Delta \text{ Cell index after 2 h} = \text{baseline cell index (1)} - \text{cell index at 2 hours}$$

227 See Fig. S4 for more details about the xCelligence system and calculations.

## 228 **Statistical Analyses**

229 Statistical analyses were performed using Prism 9.3.1 (GraphPad, USA) except for RNA-seq  
230 data where DESeq2 and R were used (see supplementary methods for details about RNA-

231 seq analysis). Prior to performing statistical comparisons in Prism, outliers were removed  
232 using the ROUT's outlier test ( $Q = 1\%$ ). Each data set was tested for normality of residuals  
233 using the Shapiro-Wilk test, and either a  $Y = \log(Y)$  transformation was performed to enable  
234 parametric testing, or data sets were analysed with non-parametric Mann-Whitney U or  
235 Kruskal-Wallis tests. To compare qPCR data generated from iPSCs and iPericytes, we  
236 performed a one-way ANOVA with a Dunnett's multiple comparisons test or Sidak's multiple  
237 comparisons test. To determine the effect of experimental conditions on proliferation, we  
238 performed a one-way ANOVA, with differences between conditions versus control  
239 determined using a Dunnett's multiple comparisons test. For the contraction assay, we  
240 performed a two-way ANOVA to determine the effect of cell type (mesoderm iPericytes,  
241 neural crest iPericytes, or HBVPs) or treatment (control, endothelin-1 or adenosine) on cell  
242 index parameters, followed by a Tukey's multiple comparison test for pair-wise  
243 comparisons. A  $p < 0.05$  was considered statistically significant. Statistical tests and results  
244 for each analysis are reported in the figure legends.

245

## 246 **Results**

### 247 **iPericytes display characteristic pericyte morphology and express canonical pericyte** 248 **markers**

249 To determine whether iPericytes have the morphological characteristics of pericytes, we  
250 collected phase contrast micrographs of mesoderm and neural crest iPericytes and HBVPs  
251 and assessed the morphological features of each cell type. Mesoderm and neural crest  
252 iPericytes had elongated fusiform cell bodies, that were similar in morphology to HBVPs (Fig.  
253 1A). *In vitro*, HBVPs adopt several morphological phenotypes, that relate to different  
254 contractile “subsets” (23). Mesoderm and neural crest iPericytes cultures also contained  
255 each of these morphological phenotypes (Fig. S2) and in proportions similar to those  
256 reported for HBVPs (23). To determine whether iPericytes express classical pericyte  
257 markers, we isolated RNA and generated cDNA to conduct a qPCR analysis. iPericytes  
258 expressed mRNAs that are integral to pericyte function, particularly: *PDGFRB*, which  
259 encodes the PDGFR $\beta$  protein; *CSPG4* which encodes NG2 proteoglycan, and *ACTA2* which  
260 encodes alpha-smooth muscle actin ( $\alpha$ SMA). Compared to iPSCs, HBVPs, mesoderm and  
261 neural crest iPericytes expressed significantly higher levels of *CSPG4* (HBVP,  $p = 0.0009$ ;  
262 neural crest iPericytes,  $p < 0.0001$ ; mesoderm iPericytes,  $p < 0.0001$ ), *ACTA2* (HBVP,  $p =$   
263  $0.0489$ ; neural crest iPericytes,  $p = 0.0022$ ; mesoderm iPericytes,  $p = 0.0190$ ), and *PDGFRB*  
264 (HBVP,  $p = 0.0947$ ; neural crest iPericytes,  $p < 0.0001$ , mesoderm iPericytes,  $p = 0.0002$ )  
265 mRNA (Fig. 1B). Conversely, HBVPs, neural crest and mesoderm iPericytes expressed  
266 pluripotency genes at a very low level; expressing less *OCT4* (HBVP,  $p < 0.0001$ ; neural crest  
267 iPericyte,  $p < 0.0001$ ; mesoderm iPericyte,  $p < 0.0001$ ) and *NANOG* (HBVP,  $p < 0.0001$ ;

268 neural crest iPericyte,  $p < 0.0001$ ; mesoderm iPericyte,  $p < 0.0001$ ) mRNA than iPSCs  
269 (Fig.1B).

270 To extend these mRNA expression findings, we performed immunocytochemistry to  
271 determine whether iPericytes expressed proteins synonymous with pericyte identity: CD13,  
272 NG2 and PDGFR $\beta$ . Mesoderm and neural crest iPericytes displayed a pattern of labelling  
273 which indicated that proteins were expressed within similar sub-cellular locations with anti-  
274 CD13, anti-NG2 and anti-PDGFR $\beta$  antibodies compared to HBVPs (Fig. 1C). Overall, these  
275 data show that iPericytes are morphologically similar to HBVPs and express mRNAs and  
276 proteins that are consistent with pericyte identity.

### 277 **Mesoderm and neural crest iPericytes have different gene expression profiles**

278 To identify differences in gene expression between mesoderm and neural crest iPericytes,  
279 and to determine how similar these cells are to HBVPs, we performed bulk RNA sequencing.  
280 A PCA revealed that the majority of the variance was accounted for through the difference  
281 between HBVPs and iPericytes regardless of lineage (PC1: 78% variance), whereas PC2 (12%  
282 variance) accounted for the variation between neural crest and mesoderm iPericytes (Fig.  
283 2A). Differential gene expression analysis was used to explore differences between HBVPs  
284 and iPericytes (Fig. 2B-D), or neural crest and mesoderm iPericytes (Fig. 2E-G). There were a  
285 substantial number of differentially expressed genes between HBVPs and iPericytes, with  
286 984 genes upregulated and 880 genes downregulated in iPericytes compared to HBVP (Fig.  
287 2B). This is also reflected in the heat map with clear differences in gene expression between  
288 HBVPs and iPericytes, regardless of lineage (Fig. 2C). Gene ontology analysis of differentially  
289 expressed genes between HBVPs and iPericytes showed enrichment for genes related to

290 tissue development, cellular division, morphology, extracellular matrix production and  
291 protein binding (Fig. 2D).

292 Next, we assessed for differential gene expression between mesoderm and neural crest  
293 iPericytes, which revealed 458 genes upregulated and 339 genes downregulated in neural  
294 crest iPericytes compared to mesoderm iPericytes (Fig. 2E). Visualisation of these  
295 differentially expressed genes via a heat map demonstrated the separation between  
296 mesoderm iPericytes and neural crest iPericytes (Fig. 2F). Gene ontology analysis showed  
297 enrichment for genes related to tissue development, extracellular matrix production,  
298 DNA/RNA processing and growth factor binding and activity (Fig. 2G). These differences  
299 could reflect changes in cellular function between mesoderm and neural crest iPericytes and  
300 HBVPs.

### 301 **Validation of the mesoderm iPericyte differentiation protocol using multiple iPSC lines**

302 To confirm that iPericyte differentiation is highly reproducible, multiple unrelated iPSC lines  
303 (MNZTASi019-A, MNZTASi021-A, and MNZTASi022-A) were cultured and used to generate  
304 mesoderm iPericytes. RNA was collected from the iPSCs and the iPericytes for bulk RNA  
305 sequencing. PCA of the gene expression profile of the iPSCs and mesoderm iPericytes  
306 revealed that each cell type (iPSCs and iPericytes) clustered separately along the first  
307 principal component, accounting for 93% of sample variation (Fig. 3A). Variation between  
308 replicates accounted for only 5% of sample variation, showing a remarkable similarity  
309 between replicates (Fig. 3A). We then selected genes associated with iPSC, pericyte,  
310 endothelial cell, microglia, oligodendrocyte progenitor cell (OPC), oligodendrocyte,  
311 astrocyte, or neuronal identity, and generated a heat map of gene expression for each iPSC  
312 line and the corresponding iPericytes (Fig. 3B). Regardless of donor, iPericytes had

313 successfully downregulated the pluripotency genes *NANOG*, *POU5F1* and *SOX2*, and  
314 upregulated pericyte-associated genes, including *PDGFRB*, *CSPG4*, *ANPEP* and *ACTA2* (Fig.  
315 3B). Gene expression was consistent across iPericytes generated from different iPSC lines  
316 (Fig. 3B). Importantly, iPericytes did not express genes synonymous with other  
317 neurovascular cell types (Fig. 3B). These data indicate this differentiation protocol can be  
318 applied to distinct iPSC lines and produce iPericytes with a consistent mRNA expression  
319 profile.

### 320 **PDGFR $\beta$ signalling promotes iPericyte proliferation**

321 mRNA expression differences between HBVPs and iPericytes could influence their capacity  
322 to respond to environmental signals, and so we next compared the proliferative capacity of  
323 these cells. A key ligand-receptor pathway that pericytes utilise for survival and proliferation  
324 is the PDGFR $\beta$  signalling pathway (20). We exposed HBVPs or iPericytes to basal pericyte  
325 medium alone (PM) or PM containing the PDGFR $\beta$  ligand, PDGF-BB (100 ng/ml), in the  
326 presence of the thymidine analogue, EdU, as previously described (20). The addition of  
327 PDGF-BB increased the proportion of HBVPs and iPericytes that incorporated EdU over a 24  
328 h period, indicative of increased proliferation (Fig. 4A & B, Fig.S3; HBVP,  $p < 0.0001$ ; neural  
329 crest iPericytes,  $p = 0.01$ ; mesoderm iPericytes,  $p < 0.0001$ ). The magnitude of response to  
330 PDGF-BB was similar between all three pericyte lines. Similar results were observed when  
331 complete pericyte media (CPM), containing specialised pericyte growth supplement  
332 (ScienCell, USA), was used compared to PM (Fig. 4B). These results indicate that iPericytes  
333 can proliferate in response to the pericyte growth factor PDGF-BB.

334 To confirm that the proliferative response was mediated by PDGFR $\beta$ , HBVP and iPericyte  
335 proliferation was assessed in the presence of imatinib. In pericytes, imatinib inhibits PDGFR $\beta$



336 phosphorylation to prevent proliferation (20). In HBVPs and iPericytes, imatinib produced a  
337 dose dependent inhibition of PDGF-BB-induced proliferation (Fig. 4C, Fig. S3). For HBVPs,  
338 0.01  $\mu$ M imatinib did not alter proliferation ( $p = 0.9851$ ), while 10  $\mu$ M imatinib and 100  $\mu$ M  
339 imatinib significantly reduced proliferation by 31% and 96% of PDGF-BB alone, respectively  
340 ( $p < 0.0001$ ). Mesoderm iPericytes also failed to respond to 0.01 $\mu$ M imatinib (51%,  $p =$   
341 0.6517), while 10  $\mu$ M and 100  $\mu$ M imatinib significantly reduced proliferation to 37% and 8%  
342 of PDGF-BB alone, respectively ( $p < 0.0001$ ). Neural crest iPericytes were less sensitive to  
343 PDGFR $\beta$  blockade, as neither 0.01 $\mu$ M ( $p = 0.9723$ ) or 10  $\mu$ M ( $p = 0.3121$ ) altered PDGF-BB-  
344 induced proliferation. However, 100  $\mu$ M imatinib significantly reduced the proliferation rate  
345 to 11% of that recorded for PDGF-BB alone ( $p = 0.0009$ ). These findings indicate that neural  
346 crest iPericytes are less sensitive than mesoderm iPericytes or HBVPs to PDGFR $\beta$  inhibition.

347 To determine why neural crest iPericytes have altered susceptibility to PDGFR $\beta$  inhibition,  
348 we interrogated our RNA-sequencing dataset, and identified differences between HBVPs,  
349 mesoderm and neural crest iPericytes, in the relative expression of mRNAs downstream of  
350 the PDGF-BB:PDGFR $\beta$  pathway. In particular, *PIK3CA* ( $\log_2\text{FoldChange} = -0.67$ ,  $p_{\text{adj}} = 2.76\text{E}^{-5}$ ),  
351 *NFKB1* ( $\log_2\text{FoldChange} = -1.28$ ,  $p_{\text{adj}} = 2.47\text{E}^{-26}$ ), *NFKB2* ( $\log_2\text{FoldChange} = -0.78$ ,  $p_{\text{adj}} =$   
352 0.00096), *CREB1* ( $\log_2\text{FoldChange} = -0.46$ ,  $p_{\text{adj}} = 2.39\text{E}^{-6}$ ) and *PTPN11* ( $\log_2\text{FoldChange} = -$   
353 0.36,  $p_{\text{adj}} = 0.003$ ) were differentially expressed between HBVPs and iPericytes, while *PIK3CA*  
354 ( $\log_2\text{FoldChange} = -0.44$ ,  $p_{\text{adj}} = 0.039$ ) and *NFKB2* ( $\log_2\text{FoldChange} = 0.68$ ,  $p_{\text{adj}} = 2.24\text{E}^{-5}$ )  
355 were differentially expressed between mesoderm and neural crest iPericytes (Fig. 4D).

356 RNAseq analysis also revealed that the expression of *PDGFR $\beta$*  was significantly higher  
357 ( $\log_2\text{FoldChange} = -1.06$ ,  $p_{\text{adj}} = 6.26\text{E}^{-6}$ ) in neural crest iPericytes compared to mesoderm  
358 iPericytes (Fig. 4D), which is in line with the qPCR data (Fig. 1B). These differences could

359 explain why neural crest iPericytes required a higher concentration of imatinib to prevent  
360 PDGF-BB mediated proliferation.

### 361 **iPericytes contract in response to endothelin-1**

362 A primary function of pericytes is to contract and dilate to modulate capillary diameter,  
363 thereby altering cerebral blood flow (4). We previously used a single cell imaging assay (23)  
364 and the xCelligence electrical impedance assay (22) to show that HBVPs can respond to  
365 vasoactive mediators. To assess the responses of mesoderm and neural crest iPericytes to  
366 endothelin-1, we again used the xCelligence system. Cells were plated on specialised cell  
367 culture plates that allow resistance to electron flow to be measured to provide an  
368 assessment of cell index (Fig. S4A). Normalised cell index values can be analysed to compare  
369 differences in slope, AUC and change in cell area after treatment with contractile mediators  
370 (Fig. S4B). It is important to note that a small reduction in normalised cell index is ordinarily  
371 observed over the first few minutes of an experiment, even under control conditions (Fig.  
372 5A & B, (22)). When mesoderm iPericytes (Fig. 5A) and neural crest iPericytes (Fig. 5B) were  
373 treated with endothelin-1, normalised cell index decreased compared to vehicle suggesting  
374 pericytes had contracted, which was confirmed when AUC was calculated (treatment:  $p =$   
375  $0.0033$ , Fig. 5C; treatment:  $p < 0.0001$ , Fig. 5F). Compared to HBVPs, contraction of  
376 mesoderm iPericytes ( $p = 0.9995$ , Fig. 5C) and neural crest iPericytes ( $p = 0.1464$ , Fig. 5F)  
377 was similar in the first 20 min of endothelin-1 exposure. The maximum contraction achieved  
378 by mesoderm iPericytes was the same as HBVPs in response to endothelin-1 (treatment:  $p =$   
379  $0.0021$ , Fig. 5D), and this was maintained over 2 h (treatment:  $p = 0.0026$ , Fig. 5E). However,  
380 there was a different effect of treatment with endothelin-1 on neural crest iPericytes in  
381 comparison to HBVPs (interaction of cell type x treatment:  $p = 0.0010$ , Fig. 5G). Post-hoc

382 analysis revealed that neural crest iPericytes maximum contraction was greater in response  
383 to endothelin-1 compared to HBVPs ( $p = 0.0007$ , Fig. 5G) and they also sustained a greater  
384 level of contraction compared to HBVPs for up to 2 h ( $p = 0.0001$ , Fig. 5H). These findings  
385 suggest that iPericytes derived through different lineages display distinct responses to  
386 endothelin-1.

387 To determine whether the lineage specific responses of iPericytes were due to differences in  
388 endothelin-1 receptor expression, we determined whether endothelin-1 receptor genes  
389 were differentially expressed between HBVPs, neural crest iPericytes and mesoderm  
390 iPericytes. *EDNRA* and *EDNRB*, genes which code for the two major endothelin-1 receptors,  
391 were differentially expressed in our RNA-seq dataset. There was a significantly different  
392 expression of both subtypes of endothelin-1 receptor between HBVPs and neural crest  
393 iPericytes (*EDNRA* Fig. 5I  $\log_2\text{FoldChange} = 2.53$ ,  $p_{\text{adj}} = 6.12\text{E}^{-23}$ ; *EDNRB* Fig. 5J  
394  $\log_2\text{FoldChange} = 5.14$ ,  $p_{\text{adj}} = 9.13\text{E}^{-26}$ ), while there was no difference between HBVP and  
395 mesoderm iPericytes (Fig. 5I, J). There was also significantly higher expression of both  
396 subtypes of endothelin-1 receptor in neural crest iPericytes compared to mesoderm  
397 iPericytes (*EDNRA* Fig. 5I  $\log_2\text{FoldChange} = -2.52$ ,  $p_{\text{adj}} = 3.12\text{E}^{-25}$ ; *EDNRB* Fig. 5J  
398  $\log_2\text{FoldChange} = -7.22$ ,  $p_{\text{adj}} = 6.77\text{E}^{-15}$ ), which might be driving their greater response to the  
399 endothelin-1 ligand. These data indicate that iPericytes can respond to endothelin-1, and  
400 that neural crest iPericytes display a greater contractile response to endothelin-1 compared  
401 to mesoderm iPericytes and HBVPs.

#### 402 **iPericytes have functional responses to the vasodilator adenosine**

403 Given we observed differences in the response of neural crest iPericytes and mesoderm  
404 iPericytes to endothelin-1, we also tested the response of iPericytes to adenosine which can

405 initiate pericyte relaxation *in vitro* (22). Similar to HBVPs, when mesoderm iPericytes (Fig.  
406 6A) and neural crest iPericytes (Fig. 6B) were exposed to adenosine, normalised cell index  
407 increased compared to vehicle conditions, indicative of pericyte relaxation. When treated  
408 with adenosine, mesoderm iPericytes relaxed (treatment:  $p = 0.0002$ , Fig. 6C) and the  
409 maximum relaxation achieved by mesoderm pericytes was the same as HBVPs in response  
410 to adenosine (treatment:  $p = 0.0002$ , Fig. 6D), however, this was not maintained over 2 h  
411 (treatment:  $p = 0.7317$ , Fig. 6E). There was a different response following adenosine  
412 treatment on neural crest iPericyte relaxation in comparison to HBVPs (interaction of cell  
413 type x treatment:  $p = 0.0202$ , Fig. 6F). Post-hoc analysis revealed that neural crest iPericytes  
414 relax less in response to adenosine compared to HBVPs ( $p = 0.0112$ , Fig. 6F), which was also  
415 observed in assessment of maximum relaxation ( $p = 0.0336$ , Fig. 6G) and relaxation at 2 h ( $p$   
416  $= 0.0170$ , Fig. 6H). These findings indicate that neural crest iPericytes display reduced ability  
417 to relax in response to adenosine compared to mesoderm iPericytes.

418 To determine whether the lineage specific responses of iPericytes were due to differences in  
419 adenosine receptor expression, we determined whether adenosine receptor genes were  
420 differentially expressed between HBVPs, neural crest iPericytes and mesoderm iPericytes.  
421 *ADORA1* and *ADORA2B*, genes which code for two of the major adenosine receptors, were  
422 differentially expressed in our RNA-seq dataset. There was a significantly different  
423 expression of adenosine receptors type *ADORA1* and *ADORA2B* between HBVPs and neural  
424 crest iPericytes (*ADORA1* Fig. 6I  $\log_2\text{FoldChange} = 3.92$ ,  $p_{\text{adj}} = 1.65\text{E}^{-11}$ ; *ADORA2B* Fig. 6J  
425  $\log_2\text{FoldChange} = -1.71$ ,  $p_{\text{adj}} = 2.93\text{E}^{-19}$ ). There was also significantly higher expression of  
426 both of these subtypes in neural crest iPericytes compared to mesoderm iPericytes  
427 (*ADORA1* Fig. 6I  $\log_2\text{FoldChange} = -1.19$ ,  $p_{\text{adj}} = 0.001$ ; *ADORA2B* Fig. 6J  $\log_2\text{FoldChange} = -$   
428  $0.61$ ,  $p_{\text{adj}} = 0.033$ ). Therefore, while differences in the expression of adenosine receptors

429 exist between HBVPs, mesoderm and neural crest iPericytes, they do not reflect differences  
430 in functional responses to adenosine. These findings suggest that iPericytes can respond to  
431 adenosine, and that neural crest iPericytes display a reduced relaxation response compared  
432 to HBVPs.

433

## 434 **Discussion**

435 iPSC-derived neurovascular cells are becoming a popular model of choice to investigate the  
436 function of the NVU *in vitro*. Methods to generate iPericytes reveal a novel avenue that will  
437 allow researchers to determine how patient specific genetic variants affect pericyte  
438 function, will help to create more accurate *in vitro* models of the NVU and disease and,  
439 ultimately, may provide a reproducible and personalised tool for implantation in  
440 regenerative medicine. To confidently use these cells to study pericyte function, it is  
441 important to establish how representative they are of primary pericytes *in vitro*. We derived  
442 mesoderm and neural crest iPericytes using a previously published protocol (16) and  
443 showed they express classical pericyte mRNAs, but do not express other brain cell markers.  
444 We then found that there were differences between mesoderm and neural crest iPericytes  
445 in their functional response to the PDGF-BB:PDGFR $\beta$  signalling pathway that mediates  
446 proliferation, and in response to known vasoactive mediators endothelin-1 and adenosine,  
447 in comparison to HBVPs.

### 448 **Mesoderm and neural crest iPericytes express key pericyte markers and morphologies**

449 Using both qPCR and immunocytochemistry, we sought to test the expression of key  
450 pericyte mRNAs or proteins in neural crest and mesoderm iPericytes derived from the TOB-  
451 00220 line. We found that both developmental lineages of iPericytes express three classical  
452 pericyte mRNAs *ANPEP* (encoding CD13), *CSPG4* (encoding NG2) and *PDGFRB* (encoding  
453 PDGFR $\beta$ ), with immunocytochemistry confirming their protein expression, in line with a  
454 previous study (16). Importantly, we also compared iPericyte mRNAs expression to primary  
455 HBVPs and showed high levels of expression compared to iPSCs. iPericytes downregulate  
456 expression of key pluripotency mRNAs *OCT4* and *NANOG*, showing a distinct change

457 compared to the iPSCs from which they were derived. In addition, iPericytes display the five  
458 morphological subtypes previously described for primary HBVPs (23). The majority of cells  
459 exhibited standard morphology, which we have previously shown possess contractile  
460 capacity (23). These data highlight that iPericytes express pericyte markers and are  
461 morphologically similar to HBVPs.

#### 462 **iPericytes retain lineage specific differences in gene expression**

463 We next sought to understand whether separate iPericyte lineages could display altered  
464 gene expression and which biological processes these were related to. Following RNA  
465 sequencing, we showed that gene expression in HBVPs was markedly different compared to  
466 both mesoderm and neural crest iPericytes. Differentially expressed genes appeared to be  
467 related to tissue development and protein binding, which could impact the function of these  
468 cells. It has already been shown that pericytes contribute to the development of the  
469 vascular network in multiple organs and they can assist in the development of key cellular  
470 structures such as the extracellular matrix (25). It is possible that differences in the genetic  
471 background of HBVPs compared to the iPSC line we used could explain the extent of  
472 differential gene expression. In addition, HBVPs could include both mesoderm and neural  
473 crest-derived pericytes given that both lineages reside in the brain (7). We also identified  
474 that there were gene expression differences between neural crest and mesoderm iPericytes  
475 that was related primarily to organ development. These differences could be explained by  
476 the mesoderm lineage being more prominent in organ development throughout the body  
477 whereas cells from the neural crest pathway would be restricted to the nervous system (26).  
478 Interestingly, genes related to growth factor binding and activity were also differentially  
479 expressed which could indicate differences in function of pericytes derived from these two

480 lineages. This was evident in both the proliferation and contractility assays where functional  
481 responses differed, suggesting pericytes of different lineages may have altered physiological  
482 responses.

### 483 **iPericytes can be consistently produced from different iPSC lines**

484 Using RNA sequencing, we showed that gene expression profiles of iPericytes that had been  
485 differentiated from three separate iPSC lines derived from three unrelated individuals were  
486 consistent between different lines. In particular, all three iPericyte lines had consistent  
487 levels of enriched pericyte mRNA expression, while downregulating expression of known  
488 stem cell genes. Notably, iPericytes did not express key markers of any other cell type such  
489 as endothelial cells, microglia, OPCs, oligodendrocytes, astrocytes, or neurons. This suggests  
490 that iPericytes can be produced with high consistency from different iPSC lines, supporting  
491 their use for assessing pericyte function in disease contexts.

### 492 **iPericytes proliferate in response to the PDGFR $\beta$ ligand PDGF-BB**

493 Although consistent expression of key pericyte mRNAs and proteins by iPericytes is  
494 encouraging, it is important that this translates into functional characteristics representative  
495 of pericytes *in vivo*. To expand our knowledge on the relative similarities between  
496 mesoderm and neural crest iPericytes, we compared their functional response to PDGF-BB,  
497 a growth factor essential for pericyte proliferation and survival (27). We have previously  
498 shown that HBVPs proliferate in response to PDGF-BB *in vitro* through the PDGFR $\beta$  receptor  
499 (20). Like HBVPs, mesoderm and neural crest iPericytes proliferated in the presence of  
500 PDGF-BB. In addition, the specificity of this proliferative response to the PDGFR $\beta$  pathway  
501 was confirmed by the blockade of this response with the PDGFR $\beta$  inhibitor imatinib, similar  
502 to HBVPs. The PDGF-BB:PDGFR $\beta$  signalling pathway is essential for pericyte and endothelial



503 cell interactions at the NVU, mediating key endothelial cell processes such as angiogenesis  
504 (27). A number of studies have assessed iPericytes in co-culture with endothelial cells (8-10,  
505 15), showing that iPericytes can specifically support endothelial tube formation and the  
506 strength of the endothelial barrier through trans-endothelial resistance measures (7-10, 16).  
507 In addition, iPericytes have been used as part of functional blood-brain barrier models (7,  
508 28-30). Furthermore, a recent study showed the capacity of iPericytes to aid in BBB repair in  
509 pericyte deficient mice, suggesting functional signalling between endothelial cells and  
510 iPericytes is also possible *in vivo* (31). These studies highlight the capacity for iPericytes to  
511 support and enhance survival and differentiation of other key cells of the NVU.

512 Until now functional studies of iPericytes have typically focussed on one pericyte  
513 developmental lineage at a time, either mesoderm (8-10) or neural crest (7, 11), restricting  
514 comparisons between the two. Here, we demonstrate for the first time that neural crest  
515 iPericytes display altered PDGFR $\beta$  signalling responses compared to HBVPs and mesoderm  
516 iPericytes, with a higher concentration of the PDGFR $\beta$  receptor inhibitor imatinib required  
517 to inhibit proliferation *in vitro*. This finding was supported by higher expression of the  
518 *PDGFRB* gene by neural crest iPericytes. These differences may reflect an inherent  
519 difference in the function of this receptor pathway between neural crest and mesoderm  
520 pericytes that should be considered for future studies.

#### 521 **iPericytes are responsive to the vasoactive mediators endothelin-1 and adenosine**

522 Another key function of pericytes is their role in blood flow regulation. It has previously  
523 been shown that pericytes possess the contractile protein  $\alpha$ SMA which can generate a  
524 contractile response in these cells (32, 33). However, there has been some discordance in  
525 the literature about expression of  $\alpha$ SMA and contractility of pericytes (4, 34). This

526 discordance has also been observed with iPericytes *in vitro* with some studies showing  
527  $\alpha$ SMA expression in iPericytes (10, 11) and some concluding that it is not expressed (7, 8).  
528 Interestingly, Kumar *et al.* (10) found that  $\alpha$ SMA expression could be triggered through a  
529 specific pericyte differentiation protocol involving PDGF-BB, vascular endothelial growth  
530 factor (VEGF), activin receptor-like kinase receptor (ALK) inhibitor SB-431542 and epidermal  
531 growth factor (EGF), suggesting certain growth factors must be present for expression of  
532  $\alpha$ SMA in iPericytes. Here, we showed that the  $\alpha$ SMA gene *ACTA2* was expressed in both  
533 neural crest and mesoderm iPericytes, with bulk RNA sequencing revealing reproducible  
534 expression of *ACTA2* in mesoderm iPericytes throughout three separate iPSC lines. Given  
535 that HBVP expression of  $\alpha$ SMA was associated with contractile ability (23), the expression of  
536  $\alpha$ SMA is suggestive of the potential to contract.

537 It has previously been shown that HBVPs contract in response to endothelin-1 and relax in  
538 response to adenosine *in vitro* (22). Using a similar approach, we found that exposing neural  
539 crest and mesoderm iPericytes to endothelin-1 led to a strong reduction in cell area  
540 indicative of cell contraction. Interestingly, neural crest iPericytes had a much stronger  
541 contractile response to endothelin-1 compared to both HBVPs and mesoderm iPericytes.  
542 Further analysis into gene expression changes revealed that the two major endothelin-1  
543 receptors (*EDNRA* and *EDNRB*) were more highly expressed in neural crest iPericytes. In  
544 addition, the expression of *ACTA2*, the gene encoding the key contractile protein  $\alpha$ SMA, was  
545 more highly expressed by neural crest iPericytes. However, neural crest iPericytes appear to  
546 not relax in response to adenosine as much as HBVPs and mesoderm iPericytes. Given that  
547 neural crest iPericytes expressed similar (*ADORA2B*) or higher (*ADORA1*) levels of adenosine  
548 receptor compared to mesoderm iPericytes, this suggests other factors may be influencing  
549 the extent to which neural crest iPericytes react to adenosine. Overall, these experiments

550 highlight the ability of iPericytes to contract and relax, with some reactivity differences  
551 between lineages.

## 552 **Conclusion**

553 Collectively, we illustrate that neural crest and mesoderm iPericytes, derived from multiple  
554 iPSC lines, are morphologically similar to HBVPs and express key pericyte markers. iPericytes  
555 are functionally active, demonstrated through proliferation in response to the key pericyte  
556 growth factor PDGF-BB, contraction in response to endothelin-1, and relaxation in response  
557 to adenosine. These findings suggest that iPericytes behave functionally like HBVPs,  
558 providing further support for their use as a tool to study pericyte function. We observed  
559 some differences between iPericytes of different lineages, notably that neural crest  
560 iPericytes were less sensitive to PDGFR $\beta$  inhibition and more contractile compared to  
561 mesoderm iPericytes. Therefore, differences between iPericytes derived through different  
562 lineages must be taken into consideration when designing experiments using iPericytes to  
563 assess pericyte function.

564

## 565 **Funding Sources**

566 This project was supported by funding from the University of Tasmania College of Health  
567 and Medicine Research Enhancement Program, National Health and Medical Research  
568 Council (APP1137776 and APP1163384), Medical Research Future Fund (EPCD000008), MS  
569 Australia (19-0696, 20-137, 21-3-023, 22-4-097), the Menzies Institute for Medical Research,  
570 and the Irene Phelps Charitable Trust. NEK, LSB and JMC were supported by Tasmanian  
571 Graduate Research Scholarships. AJF was supported by a Research Training Program  
572 Scholarship.

## 573 **Conflicts of Interest**

574 Authors declare no competing interests.

## 575 **Author Contributions**

576 NEK: methodology; validation; investigation; formal analysis; visualisation; writing - original  
577 draft; writing – review and editing. J-MC: methodology; software; formal analysis;  
578 investigation; resources; data curation; writing-review and editing; visualisation;  
579 supervision. LSB: methodology; formal analysis; investigation; writing-review and editing;  
580 visualisation. AJF: investigation; methodology; formal analysis; visualisation; writing –  
581 review and editing. NBB: data curation; methodology; formal analysis; visualisation;  
582 supervision; writing – review and editing. JLF: investigation; methodology; supervision;  
583 writing - review and editing. JMC: methodology; investigation; writing-review and editing.  
584 JT: methodology; writing – review and editing. AP: methodology; resources; writing – review  
585 and editing. AWH: methodology; resources; writing – review and editing. GPM:

586 methodology; supervision; writing - original draft; writing – review and editing. KMY:  
587 conceptualisation; funding acquisition; methodology; project administration; resources;  
588 supervision; writing – review and editing. ALC: conceptualisation; funding acquisition;  
589 methodology; project administration; resources; supervision; writing – review and editing.  
590 BAS: conceptualisation; funding acquisition; methodology; project administration;  
591 resources; supervision; writing – original draft; writing – review and editing.

## 592 **Acknowledgements**

593 We would like to thank study participants who donated cells for iPSC generation. The  
594 University of Tasmania provided core laboratory facilities for this work. We would like to  
595 acknowledge the use of the high-performance computing facilities provided by Digital  
596 Research at the University of Tasmania. We would like to acknowledge the Australian  
597 Genome Research Facility (AGRF) who performed all of the RNA sequencing for gene  
598 expression analysis.

## 599 **Data Availability**

600 Please contact Kaylene Young ([Kaylene.young@utas.edu.au](mailto:Kaylene.young@utas.edu.au)) to source MS Stem iPSCs.  
601 Imaging data are available from the corresponding author upon reasonable request. Bulk  
602 RNA sequencing data will be made available online upon a revised submission.

603

## 604 **Figure Legends**

### 605 **Figure 1. iPericytes are morphologically similar to HBVPs and express pericyte markers.** (A)

606 Phase contrast bright 4x magnification images of iPSCs, HBVPs, mesoderm iPericytes and  
607 neural crest iPericytes. Scale = 200 $\mu$ m. (B) Fold change gene expression measured by qPCR  
608 of pericyte genes *PDGFRB*, *CSPG4*, *ACTA2* and pluripotency genes *OCT4* and *NANOG* by  
609 iPSCs, neural crest iPericytes, mesoderm iPericytes and HBVPs (n = 3 per cell type). Data are  
610 normalised to HBVP cells, and comparisons were made using a one-way ANOVA: *PDGFRB* (F  
611 (3, 8) = 103.1, p < 0.0001), *CSPG4* (F (3, 8) = 4671, p < 0.0001), *ACTA2* (F (3, 8) = 9.340, p <  
612 0.0054), *OCT4* (F (3, 8) = 1686, p < 0.0001) and *NANOG* (F (3, 8) = 606.4, p < 0.0001). Post-  
613 hoc comparisons performed using Dunnett's multiple comparisons test: \* p < 0.05, \*\* p <  
614 0.01, \*\*\* p < 0.001, \*\*\*\* p < 0.0001. Data are shown as mean  $\pm$  SD. (C)

615 Immunocytochemistry showing expression of pericyte proteins CD13, NG2 and PDGFR $\beta$   
616 (green) by HBVP, mesoderm iPericytes and neural crest iPericytes. Nuclei counter-stained  
617 with DAPI (blue). Scale = 20  $\mu$ m.

618

### 619 **Figure 2. iPericytes derived through different lineage pathways have differential**

620 **expression of genes.** (A) PCA analysis showing separate clustering of mesoderm iPericytes,  
621 neural crest iPericytes and HBVPs (n = 6 for HBVPs, n = 3 for mesoderm or neural crest  
622 iPericytes). (B) Volcano plots showing upregulated and downregulated genes in iPericytes  
623 compared to HBVPs. (C) Heat map showing differentially expressed genes in iPericytes  
624 compared to HBVPs. (D) Gene ontology analysis of key biological processes, cellular  
625 compartments and molecular function associated with 1,864 differentially expressed genes  
626 between iPericytes and HBVPs. (E) Volcano plots showing upregulated and downregulated

627 genes in neural crest iPericytes compared to mesoderm iPericytes. (F) Heat map showing  
628 differentially expressed genes in neural crest iPericytes compared to mesoderm iPericytes.  
629 (G) Gene ontology analysis of key biological processes, cellular compartments and molecular  
630 function associated with 797 differentially expressed genes between neural crest iPericytes  
631 and mesoderm iPericytes.

632

633 **Figure 3. Mesoderm iPericytes from multiple cell lines have similar mRNA expression.** (A)

634 Principal components analysis showing separate clustering of mesoderm iPericytes and  
635 iPSCs from n = 3 different cell lines. (B) Heat map showing relative expression levels in iPSCs  
636 and mesoderm iPericytes of key genes typically expressed by iPSCs, pericytes, endothelial  
637 cells (EC), microglia (MG), oligodendrocyte precursor cells (OPCs), oligodendrocytes (OL),  
638 astrocytes (AST) and neurons (NEU). Warmer colours indicate higher expression, cooler  
639 colours indicate lower expression.

640

641 **Figure 4. Proliferation of iPericytes through the PDGF-BB: PDGFR $\beta$  signalling pathway.** (A)

642 iPericytes were incubated in basal pericyte media (PM) and treated with PDGF-BB (PM +  
643 PDGF-BB) while being exposed to 100  $\mu$ M imatinib (PM + PDGF-BB + 100 $\mu$ M imatinib).  
644 Proliferation was measured using an EdU uptake assay. iPericytes that are EdU-positive are  
645 indicated by magenta, while total number of iPericytes were measured by DAPI (blue). Scale  
646 bar = 50  $\mu$ m. (B) Quantification of HBVPs, neural crest iPericytes and mesoderm iPericytes  
647 proliferating (as indicated by EdU-positive staining) as a percentage of total cells following  
648 24 h exposure to PM, complete pericyte media with pericyte growth factors (CPM) or PM +  
649 PDGF-BB (n = 8 per condition). Data were analysed using a one-way ANOVA: HBVP (F (2, 21)

650 = 35.52,  $p < 0.0001$ ); neural crest iPericyte ( $F(2, 21) = 30.85$ ,  $p < 0.0001$ ); mesoderm  
651 iPericyte ( $F(2, 21) = 191.4$ ,  $p < 0.0001$ ). (C) Quantification of changes to PDGF-BB-induced  
652 proliferation with increasing concentrations of imatinib over 24 h in HBVPs, neural crest  
653 iPericytes and mesoderm iPericytes ( $n = 8$  per condition). Data were analysed using a one-  
654 way ANOVA or Kruskal-Wallis test: HBVP ( $F(3, 26) = 259.2$ ,  $p < 0.0001$ ); neural crest  
655 iPericyte ( $H(3) = 24.41$ ,  $p < 0.0001$ ); mesoderm iPericyte ( $F(3, 28) = 221.5$ ,  $p < 0.0001$ ). For  
656 (B) and (C), post-hoc comparisons were performed using Dunnett's multiple comparisons or  
657 Dunn's test: \*  $p < 0.05$ , \*\*  $p < 0.01$ , \*\*\*  $p < 0.001$ , \*\*\*\*  $p < 0.0001$ . Data shown as mean  $\pm$   
658 SD. (D) Heat map of key genes involved in pericyte proliferation in the PDGF-BB: PDGFR $\beta$   
659 signalling pathway in HBVP, neural crest iPericytes and mesoderm iPericytes selected from  
660 Sweeney et al. 2016 (27).

661

662 **Figure 5. Endothelin-1 induces iPericyte contraction.** (A-B) Normalised cell index of neural  
663 crest iPericytes, mesoderm iPericytes and HBVPs treated with endothelin-1 or vehicle (CPM)  
664 over a period of 2 h ( $n = 4$  per condition). (C-E) Quantified AUC,  $\Delta$  cell index and  $\Delta$  cell index  
665 after 2 h for mesoderm iPericytes and HBVPs treated with control or endothelin-1 analysed  
666 using two-way ANOVA: AUC (cell type:  $F(1, 12) = 0.6953$ ,  $p = 0.4206$ ; treatment: ( $F(1, 12) =$   
667  $13.35$ ,  $p = 0.0033$ ; interaction:  $F(1, 12) = 0.1006$ ,  $p = 0.7565$ );  $\Delta$  cell index (cell type:  $F(1, 12)$   
668  $= 0.02309$ ,  $p = 0.8817$ ; treatment:  $F(1, 12) = 15.21$ ,  $p = 0.0021$ ; interaction:  $F(1, 12) =$   
669  $0.5773$ ,  $p = 0.4620$ );  $\Delta$  cell index after 2 h (cell type:  $F(1, 12) = 1.590$ ,  $p = 0.2313$ ; treatment:  
670  $F(1, 12) = 14.31$ ,  $p = 0.0026$ ; interaction:  $F(1, 12) = 0.5518$ ,  $p = 0.4719$ ). (F-H) Quantified  
671 AUC (indicator of volume of contraction),  $\Delta$  cell index (maximum contraction) and  $\Delta$  cell  
672 index after 2 h (contraction at 2 h time point) for neural crest iPericytes and HBVPs treated



673 with control or endothelin-1 analysed using two-way ANOVA: AUC (cell type: F (1, 12) =  
674 1.563, p = 0.2351; treatment: (F (1, 12) = 54.67, p < 0.0001; interaction: F (1, 12) = 5.470, p =  
675 0.0375);  $\Delta$  cell index (cell type: F (1, 12) = 13.53, p = 0.0032; treatment: F (1, 12) = 66.11, p <  
676 0.0001; interaction: F (1, 12) = 18.47, p = 0.0010);  $\Delta$  cell index after 2 h (cell type: F (1, 12) =  
677 34.64, p < 0.0001; treatment: F (1, 12) = 38.56, p < 0.0001; interaction F (1, 12) = 14.70, p =  
678 0.0024). (C-H) Post-hoc comparisons performed using Sidak's multiple comparisons test. \* p  
679 < 0.05, \*\* p < 0.01, \*\*\* p < 0.001, \*\*\*\* p < 0.0001. Data shown as mean  $\pm$  SD. (I-J)  
680 Normalised gene expression counts of differentially expressed endothelin-1 receptors in  
681 HBVP, neural crest iPericytes and mesoderm iPericytes compared using DEseq: HBVPs and  
682 neural crest iPericytes *EDNRA* Fig. 5I log2FoldChange = 2.53,  $p_{\text{adj}} = 6.12\text{E}^{-23}$ ; *EDNRB* Fig. 5J  
683 log2FoldChange = 5.14,  $p_{\text{adj}} = 9.13\text{E}^{-26}$ ; neural crest iPericytes compared to mesoderm  
684 iPericytes *EDNRA* (I) log2FoldChange = -2.52,  $p_{\text{adj}} = 3.12387\text{E}^{-25}$ ; *EDNRB* (J) log2FoldChange =  
685 -7.22,  $p_{\text{adj}} = 6.77016\text{E}^{-15}$ .

686

687 **Figure 6. Adenosine induces iPericyte relaxation.** (A-B) Normalised cell index of neural crest  
688 iPericytes, mesoderm iPericytes and HBVPs treated with adenosine or vehicle (CPM) over a  
689 period of 2 h (n = 4 per condition). (C-E) Quantified AUC,  $\Delta$  cell index and  $\Delta$  cell index after 2  
690 h for mesoderm iPericytes and HBVPs treated with control or adenosine analysed using two-  
691 way ANOVA: AUC (cell type: F (1, 12) = 6.583, p = 0.0247; treatment: (F (1, 12) = 26.84, p  
692 = 0.0002; interaction: F (1, 12) = 6.027, p = 0.0303);  $\Delta$  cell index (cell type: F (1, 12) = 6.387, p  
693 = 0.0265; treatment: F (1, 12) = 28.26, p = 0.0002; interaction: F (1, 12) = 1.284, p = 0.2794);  
694  $\Delta$  cell index after 2 h (cell type: F (1, 12) = 1.460, p = 0.2502; treatment: F (1, 12) = 0.1232, p  
695 = 0.7317; interaction: F (1, 12) = 1.174, p = 0.2999). (F-H) Quantified AUC,  $\Delta$  cell index and  $\Delta$

696 cell index after 2 h for neural crest iPericytes and HBVPs treated with control or adenosine  
697 analysed using two-way ANOVA: AUC (cell type:  $F(1, 12) = 8.596$ ,  $p = 0.0126$ ; treatment: ( $F$   
698  $(1, 12) = 50.38$ ,  $p < 0.0001$ ; interaction:  $F(1, 12) = 7.159$ ,  $p = 0.0202$ );  $\Delta$  cell index (cell type:  $F$   
699  $(1, 12) = 7.881$ ,  $p = 0.0158$ ; treatment:  $F(1, 12) = 57.12$ ,  $p < 0.0001$ ; interaction:  $F(1, 12) =$   
700  $3.777$ ,  $p = 0.0758$ );  $\Delta$  cell index after 2 h (cell type:  $F(1, 12) = 16.46$ ,  $p = 0.0016$ ; treatment:  $F$   
701  $(1, 12) = 20.58$ ,  $p = 0.0007$ ; interaction:  $F(1, 12) = 1.500$ ,  $p = 0.2442$ ). (C-H) Post-hoc  
702 comparisons performed using Sidak's multiple comparisons test. \*  $p < 0.05$ , \*\*  $p < 0.01$ , \*\*\*  
703  $p < 0.001$ , \*\*\*\*  $p < 0.0001$ . Data shown as mean  $\pm$  SD. (I-J) Normalised gene expression  
704 counts of differentially expressed adenosine receptors in HBVP, neural crest iPericytes and  
705 mesoderm iPericytes compared using DEseq: HBVPs and neural crest iPericytes *ADORA1* (I)  
706  $\log_2\text{FoldChange} = 3.92$ ,  $p_{\text{adj}} = 1.65E^{-11}$ ; *ADORA2B* (J)  $\log_2\text{FoldChange} = -1.71$ ,  $p_{\text{adj}} = 2.93E^{-19}$ ;  
707 HBVPs and mesoderm iPericytes *ADORA1* (I)  $\log_2\text{FoldChange} = 2.72$ ,  $p_{\text{adj}} = 0.00006$ ;  
708 *ADORA2B* (J)  $\log_2\text{FoldChange} = -2.33$ ,  $p_{\text{adj}} = 1.52E^{-25}$ ; neural crest iPericytes compared to  
709 mesoderm iPericytes *ADORA1* (I)  $\log_2\text{FoldChange} = -1.19$ ,  $p_{\text{adj}} = 0.001$ ; *ADORA2B* (J)  
710  $\log_2\text{FoldChange} = -0.61$ ,  $p_{\text{adj}} = 0.03288$ .

711

## 712 **References**

- 713 1. Brown LS, Foster CG, Courtney J-M, King NE, Howells DW, Sutherland BA. Pericytes  
714 and Neurovascular Function in the Healthy and Diseased Brain. *Frontiers in Cellular*  
715 *Neuroscience*. 2019;13(282).
- 716 2. Cashion JM, Young KM, Sutherland BA. How does neurovascular unit dysfunction  
717 contribute to multiple sclerosis? *Neurobiology of Disease*. 2023;178:106028.
- 718 3. Nortley R, Korte N, Izquierdo P, Hirunpattarasilp C, Mishra A, Jaunmuktane Z, et al.  
719 Amyloid beta oligomers constrict human capillaries in Alzheimer's disease via  
720 signaling to pericytes. *Science*. 2019;365(6450).
- 721 4. Hall CN, Reynell C, Gesslein B, Hamilton NB, Mishra A, Sutherland BA, et al. Capillary  
722 pericytes regulate cerebral blood flow in health and disease. *Nature*.  
723 2014;508(7494):55-60.
- 724 5. Shibahara T, Ago T, Nakamura K, Tachibana M, Yoshikawa Y, Komori M, et al.  
725 Pericyte-Mediated Tissue Repair through PDGFR $\beta$  Promotes Peri-Infarct Astrogliosis,  
726 Oligodendrogenesis, and Functional Recovery after Acute Ischemic Stroke. *eNeuro*.  
727 2020;7(2).
- 728 6. Kusuma S, Shen YI, Hanjaya-Putra D, Mali P, Cheng L, Gerecht S. Self-organized  
729 vascular networks from human pluripotent stem cells in a synthetic matrix. *Proc Natl*  
730 *Acad Sci U S A*. 2013;110(31):12601-6.
- 731 7. Stebbins MJ, Gastfriend BD, Canfield SG, Lee MS, Richards D, Faubion MG, et al.  
732 Human pluripotent stem cell-derived brain pericyte-like cells induce blood-brain  
733 barrier properties. *Sci Adv*. 2019;5(3):eaau7375.
- 734 8. Dar A, Domev H, Ben-Yosef O, Tzukerman M, Zeevi-Levin N, Novak A, et al.  
735 Multipotent vasculogenic pericytes from human pluripotent stem cells promote  
736 recovery of murine ischemic limb. *Circulation*. 2012;125(1):87-99.
- 737 9. Orlova VV, Drabsch Y, Freund C, Petrus-Reurer S, van den Hil FE, Muenthaisong S, et  
738 al. Functionality of endothelial cells and pericytes from human pluripotent stem cells  
739 demonstrated in cultured vascular plexus and zebrafish xenografts. *Arterioscler*  
740 *Thromb Vasc Biol*. 2014;34(1):177-86.
- 741 10. Kumar A, D'Souza SS, Moskvina OV, Toh H, Wang B, Zhang J, et al. Specification and  
742 Diversification of Pericytes and Smooth Muscle Cells from Mesenchymoangioblasts.  
743 *Cell Rep*. 2017;19(9):1902-16.
- 744 11. Kelleher J, Dickinson A, Cain S, Hu Y, Bates N, Harvey A, et al. Patient-Specific iPSC  
745 Model of a Genetic Vascular Dementia Syndrome Reveals Failure of Mural Cells to  
746 Stabilize Capillary Structures. *Stem Cell Reports*. 2019;13(5):817-31.

- 747 12. Fortune AJ, Fletcher JL, Blackburn NB, Young KM. Using MS induced pluripotent stem  
748 cells to investigate MS aetiology. *Mult Scler Relat Disord*. 2022;63:103839.
- 749 13. Stanton AE, Bubnys A, Agbas E, James B, Park DS, Jiang A, et al. Engineered 3D  
750 Immuno-Glial-Neurovascular Human Brain Model. *bioRxiv*. 2023.
- 751 14. Tachibana M, Yamazaki Y, Liu CC, Bu G, Kanekiyo T. Pericyte implantation in the brain  
752 enhances cerebral blood flow and reduces amyloid- $\beta$  pathology in amyloid model  
753 mice. *Exp Neurol*. 2018;300:13-21.
- 754 15. Orlova VV, van den Hil FE, Petrus-Reurer S, Drabsch Y, Ten Dijke P, Mummery CL.  
755 Generation, expansion and functional analysis of endothelial cells and pericytes  
756 derived from human pluripotent stem cells. *Nat Protoc*. 2014;9(6):1514-31.
- 757 16. Faal T, Phan DTT, Davtyan H, Scarfone VM, Varady E, Blurton-Jones M, et al.  
758 Induction of Mesoderm and Neural Crest-Derived Pericytes from Human Pluripotent  
759 Stem Cells to Study Blood-Brain Barrier Interactions. *Stem Cell Reports*.  
760 2019;12(3):451-60.
- 761 17. Daniszewski M, Senabouth A, Liang HH, Han X, Lidgerwood GE, Hernández D, et al.  
762 Retinal ganglion cell-specific genetic regulation in primary open-angle glaucoma. *Cell*  
763 *Genomics*. 2022;2(6):100142.
- 764 18. Fortune AJ, Taylor BV, Charlesworth JC, Burdon KP, Blackburn NB, Fletcher JL, et al.  
765 Generation and characterisation of four multiple sclerosis iPSC lines from a single  
766 family. *Stem Cell Res*. 2022;62:102828.
- 767 19. Mehta A, Lu P, Taylor BV, Charlesworth J, Cook AL, Burdon KP, et al. Generation of  
768 MNZTASi001-A, a human pluripotent stem cell line from a person with primary  
769 progressive multiple sclerosis. *Stem Cell Research*. 2021;57:102568.
- 770 20. King NE, Courtney JM, Brown LS, Foster CG, Cashion JM, Attrill E, et al.  
771 Pharmacological PDGFR $\beta$  inhibitors imatinib and sunitinib cause human brain  
772 pericyte death in vitro. *Toxicol Appl Pharmacol*. 2022;444:116025.
- 773 21. Courtney JM, Morris GP, Cleary EM, Howells DW, Sutherland BA. An Automated  
774 Approach to Improve the Quantification of Pericytes and Microglia in Whole Mouse  
775 Brain Sections. *eNeuro*. 2021;8(6).
- 776 22. Neuhaus AA, Couch Y, Sutherland BA, Buchan AM. Novel method to study pericyte  
777 contractility and responses to ischaemia in vitro using electrical impedance. *J Cereb*  
778 *Blood Flow Metab*. 2017;37(6):2013-24.
- 779 23. Brown LS, King NE, Courtney JM, Gasperini RJ, Foa L, Howells DW, et al. Brain  
780 pericytes in culture display diverse morphological and functional phenotypes. *Cell*  
781 *Biol Toxicol*. 2023.

- 782 24. Hibbs E, Love S, Miners JS. Pericyte Contractile Responses to Endothelin-1 and A $\beta$   
783 Peptides: Assessment by Electrical Impedance Assay. *Frontiers in Cellular*  
784 *Neuroscience*. 2021;15.
- 785 25. Bergers G, Song S. The role of pericytes in blood-vessel formation and maintenance.  
786 *Neuro Oncol*. 2005;7(4):452-64.
- 787 26. Armulik A, Genové G, Betsholtz C. Pericytes: Developmental, Physiological, and  
788 Pathological Perspectives, Problems, and Promises. *Developmental Cell*.  
789 2011;21(2):193-215.
- 790 27. Sweeney MD, Ayyadurai S, Zlokovic BV. Pericytes of the neurovascular unit: key  
791 functions and signaling pathways. *Nat Neurosci*. 2016;19(6):771-83.
- 792 28. Canfield SG, Stebbins MJ, Faubion MG, Gastfriend BD, Palecek SP, Shusta EV. An  
793 isogenic neurovascular unit model comprised of human induced pluripotent stem  
794 cell-derived brain microvascular endothelial cells, pericytes, astrocytes, and neurons.  
795 *Fluids and Barriers of the CNS*. 2019;16(1):25.
- 796 29. Linville RM, Sklar MB, Grifno GN, Nerenberg RF, Zhou J, Ye R, et al. Three-  
797 dimensional microenvironment regulates gene expression, function, and tight  
798 junction dynamics of iPSC-derived blood-brain barrier microvessels. *Fluids Barriers*  
799 *CNS*. 2022;19(1):87.
- 800 30. Mesentier-Louro LA, Suhy N, Broekaart D, Bula M, Pereira AC, Blanchard JW.  
801 Modeling the Blood-Brain Barrier Using Human-Induced Pluripotent Stem Cells.  
802 *Methods Mol Biol*. 2023;2683:135-51.
- 803 31. Bosworth A, Griffin C, Chakhoyan A, Sagare AP, Nelson AR, Wang Y, et al. Molecular  
804 signature and functional properties of human pluripotent stem cell-derived brain  
805 pericytes. *bioRxiv*. 2023:2023.06.26.546577.
- 806 32. Alarcon-Martinez L, Yilmaz-Ozcan S, Yemisci M, Schallek J, Kılıç K, Can A, et al.  
807 Capillary pericytes express  $\alpha$ -smooth muscle actin, which requires prevention of  
808 filamentous-actin depolymerization for detection. *Elife*. 2018;7.
- 809 33. Hartmann DA, Berthiaume A-A, Grant RI, Harrill SA, Koski T, Tieu T, et al. Brain  
810 capillary pericytes exert a substantial but slow influence on blood flow. *Nature*  
811 *Neuroscience*. 2021;24(5):633-45.
- 812 34. Hill RA, Tong L, Yuan P, Murikinati S, Gupta S, Grutzendler J. Regional Blood Flow in  
813 the Normal and Ischemic Brain Is Controlled by Arteriolar Smooth Muscle Cell  
814 Contractility and Not by Capillary Pericytes. *Neuron*. 2015;87(1):95-110.

815

816

**A**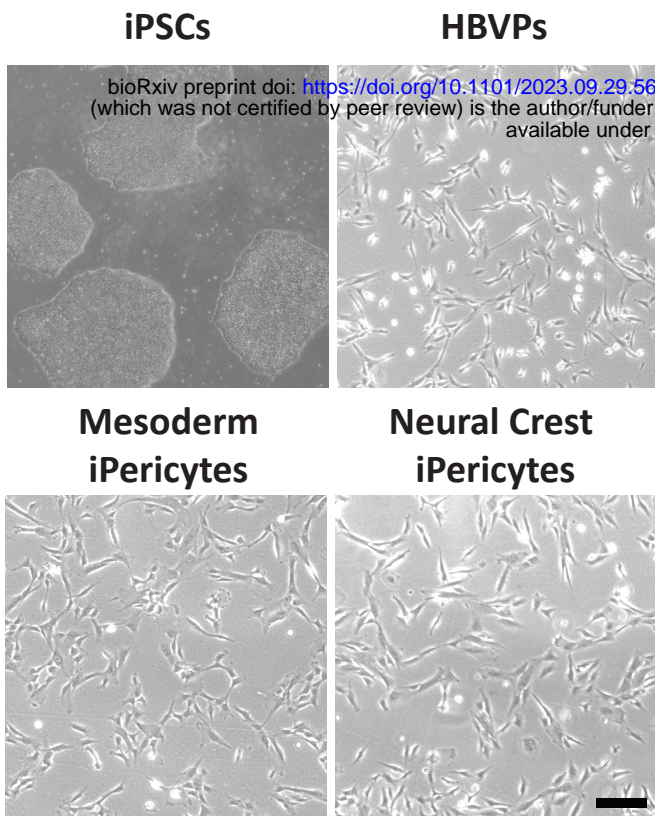**C**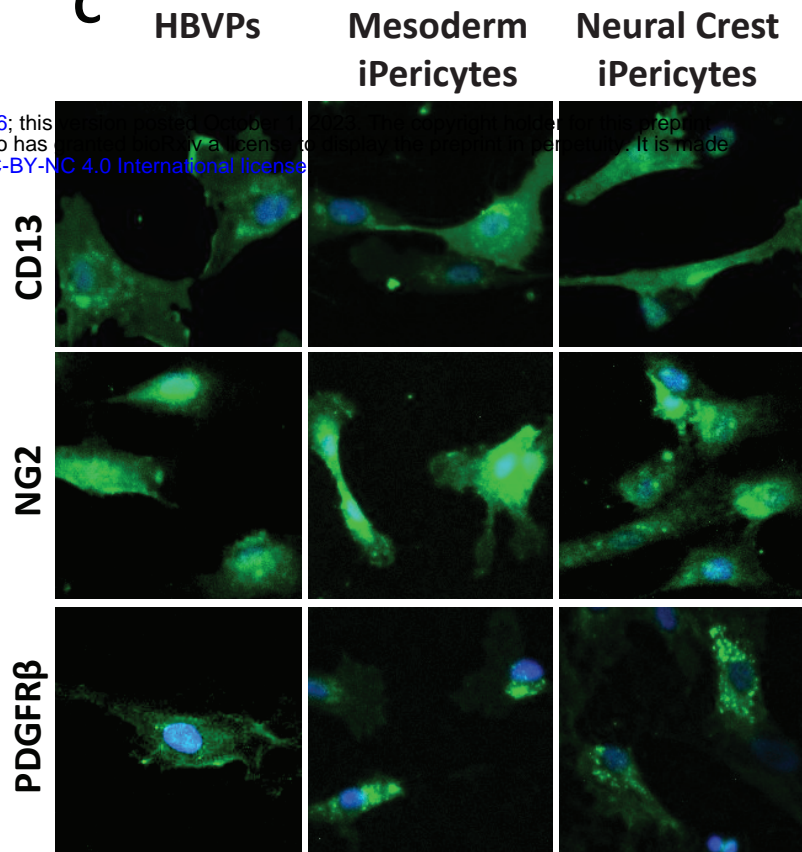**B****PDGFR $\beta$** 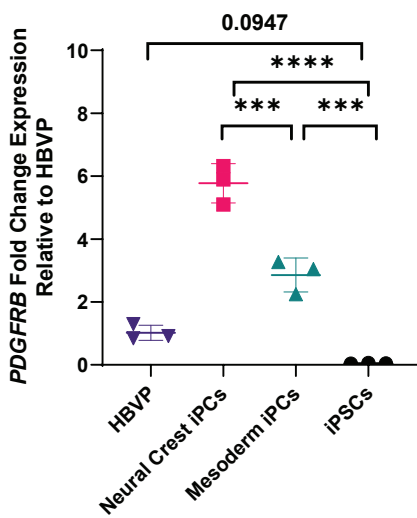**CSPG4**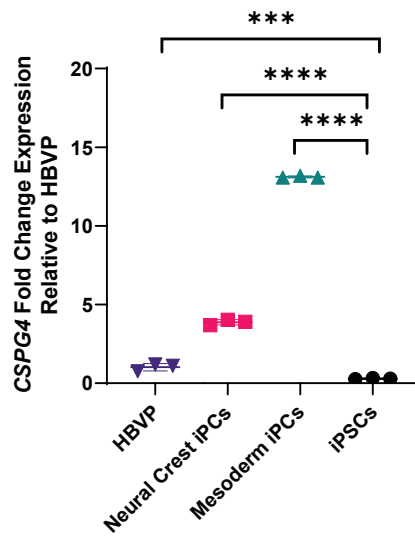**ACTA2 ( $\alpha$ SMA)**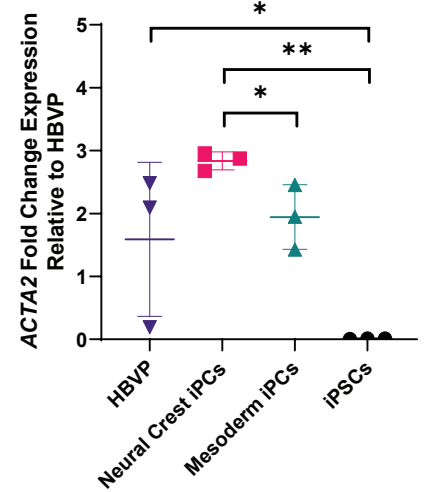**OCT4**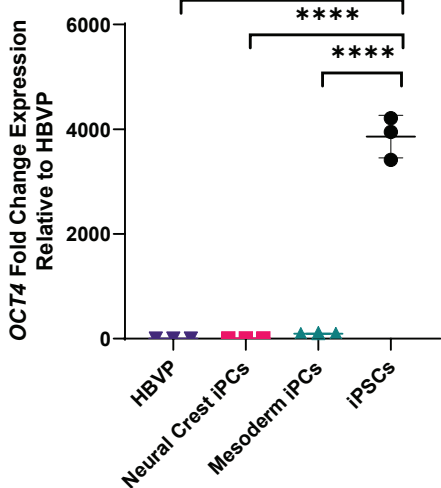**NANOG**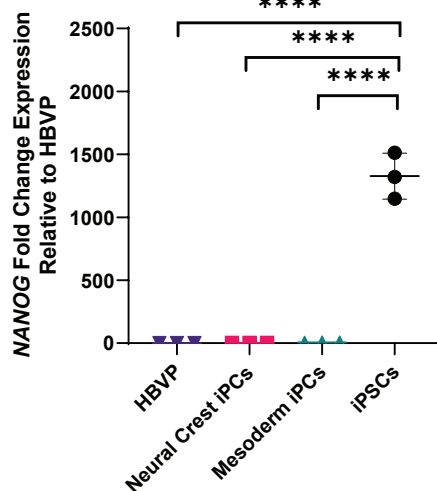

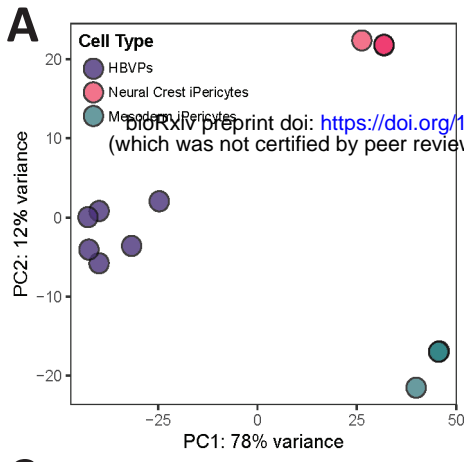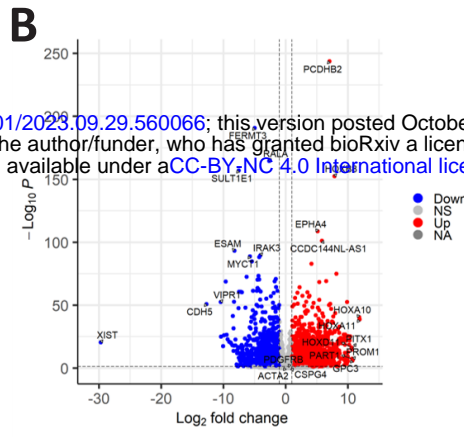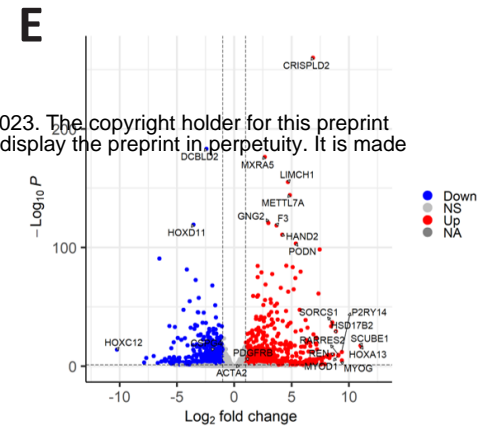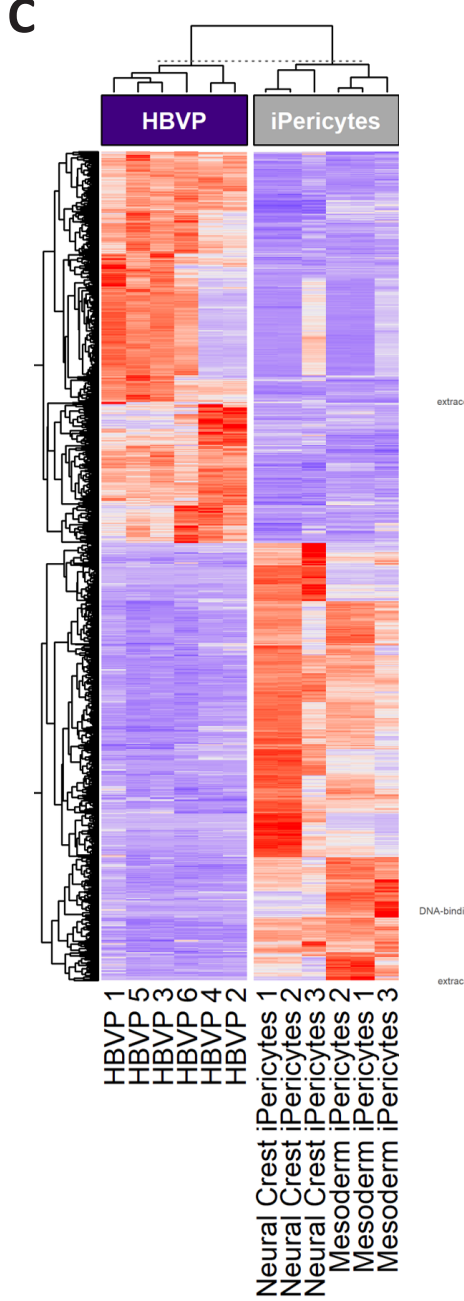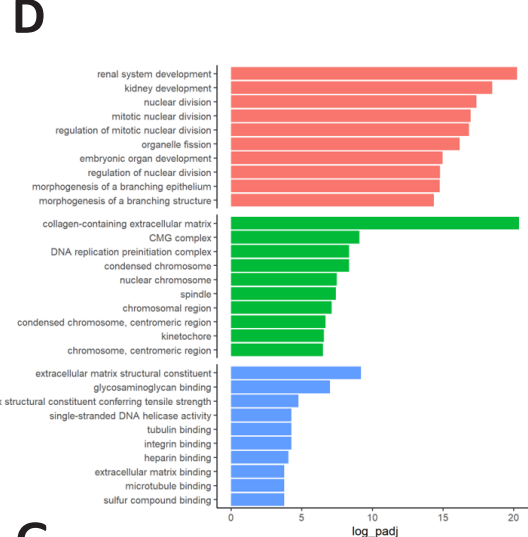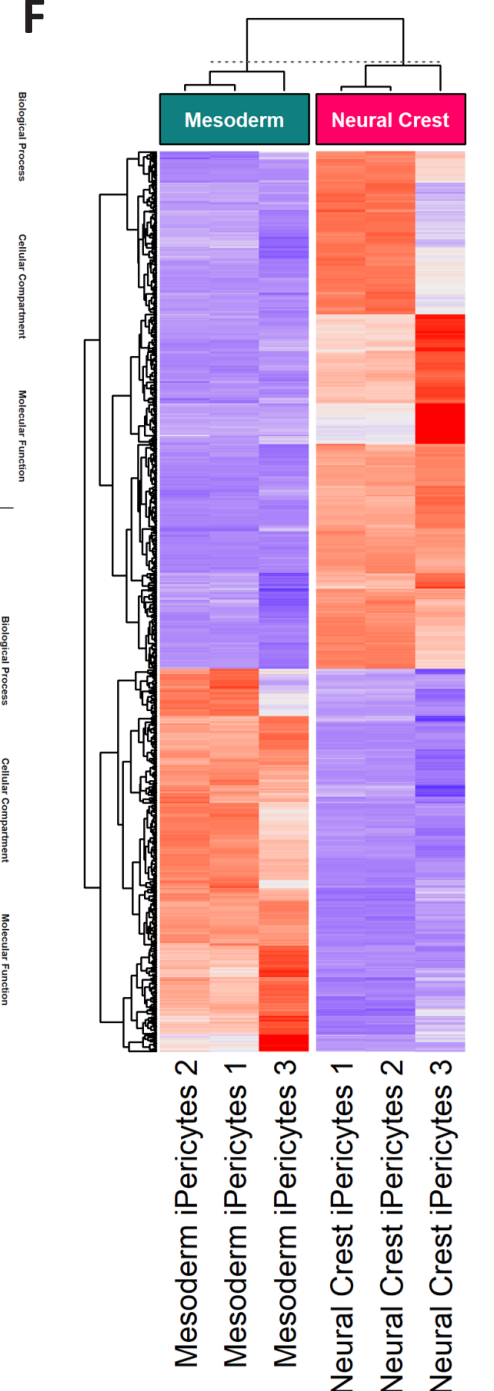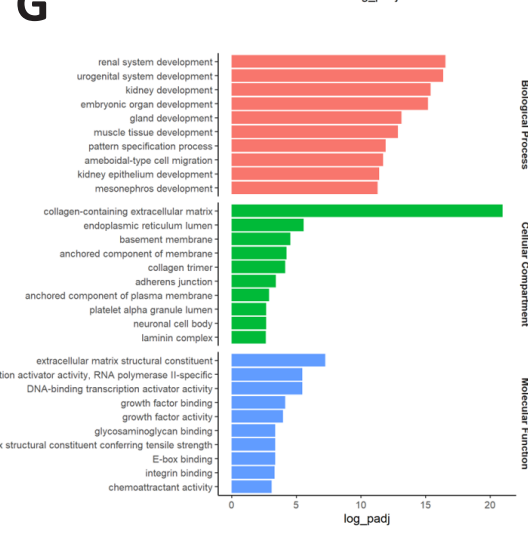

**A**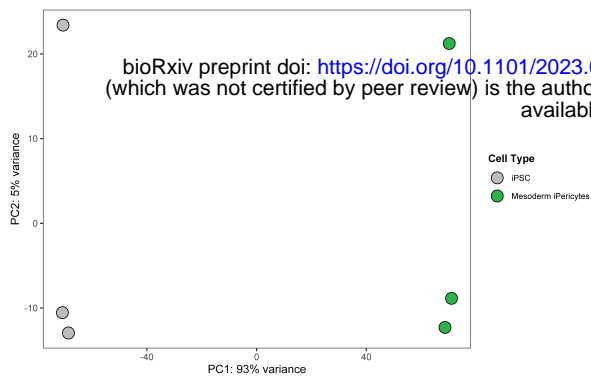**B**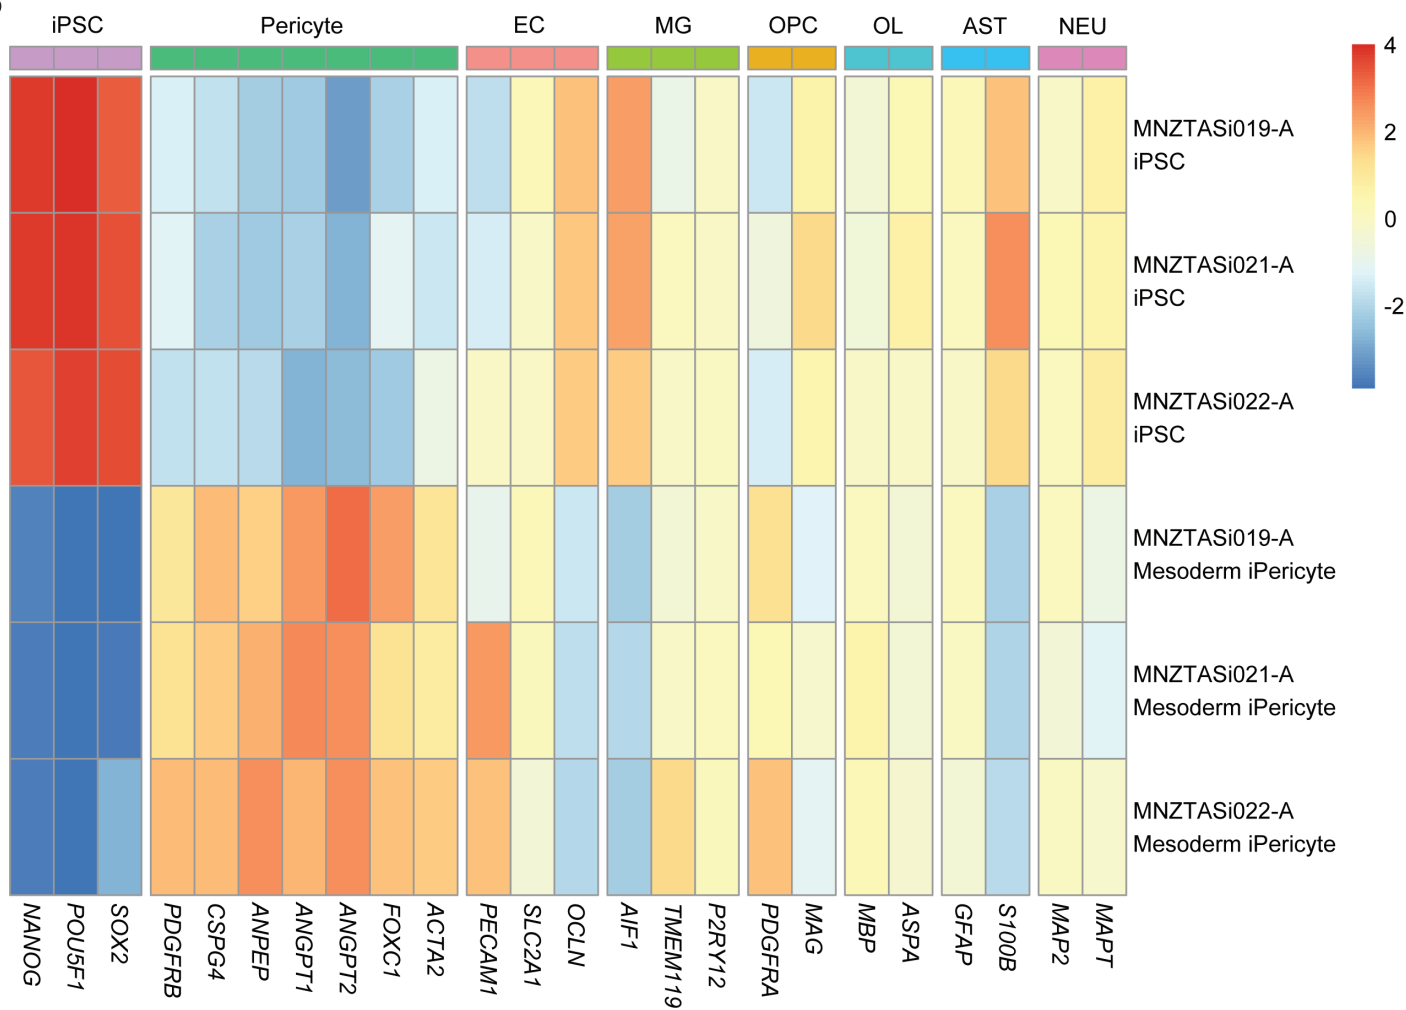



**A**

Base Pericyte Media (PM)

PM + PDGF-BB

PM + PDGF-BB  
+ 100μM Imatinib

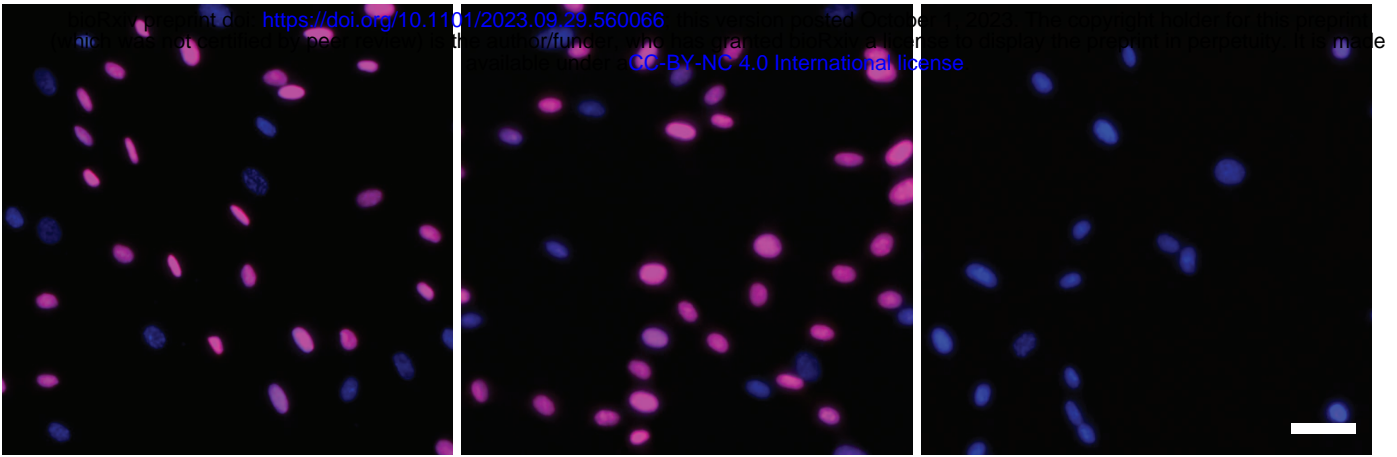

**B**

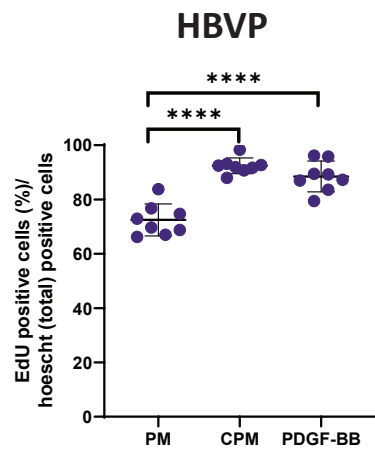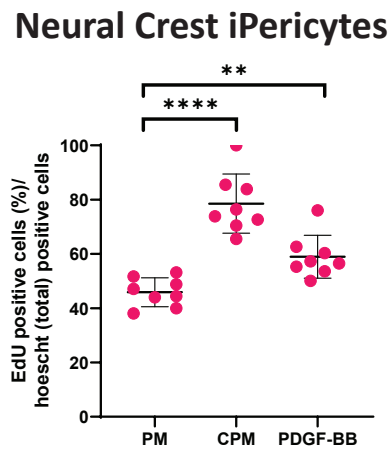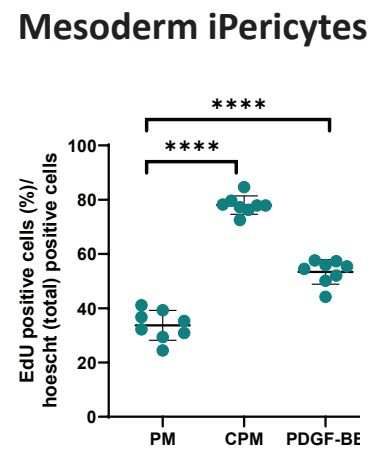

**C**

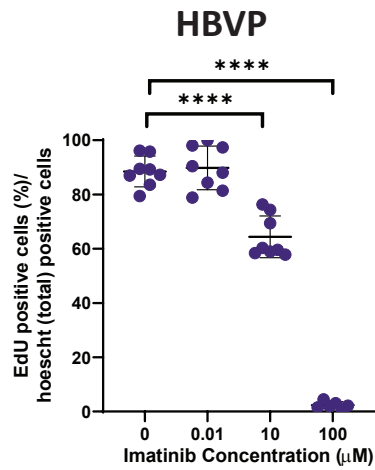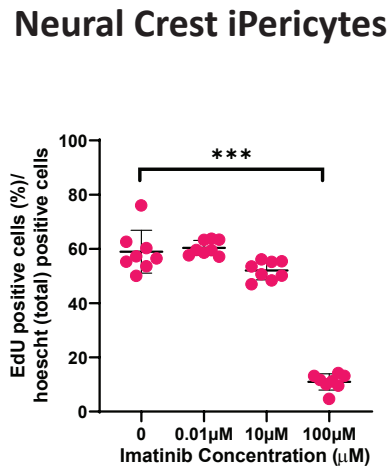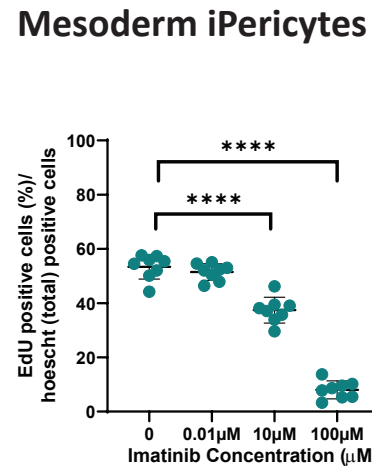

**D**

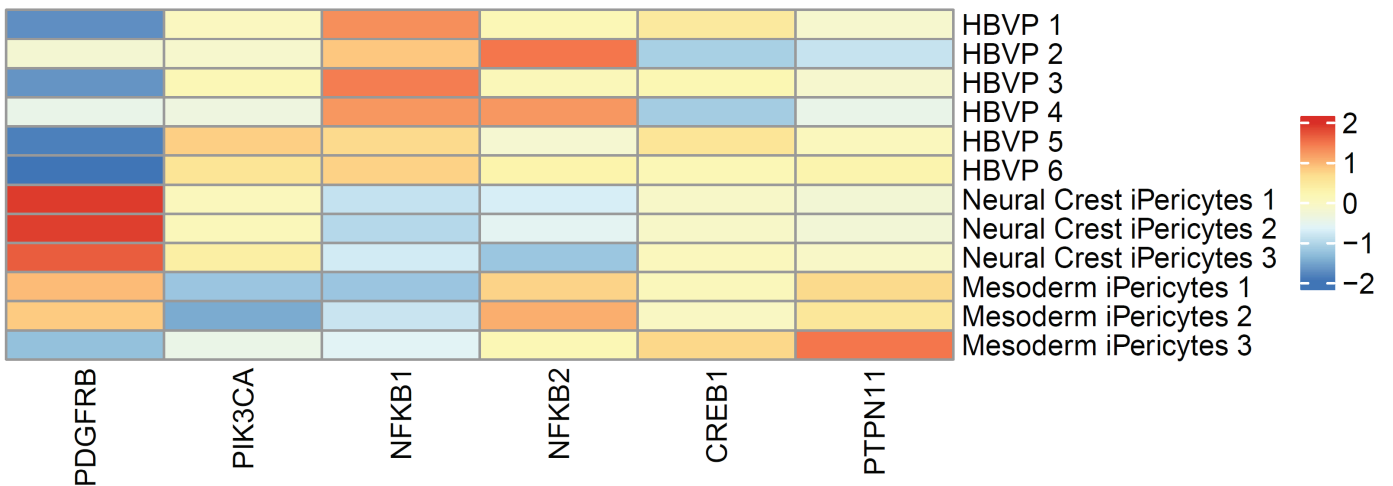

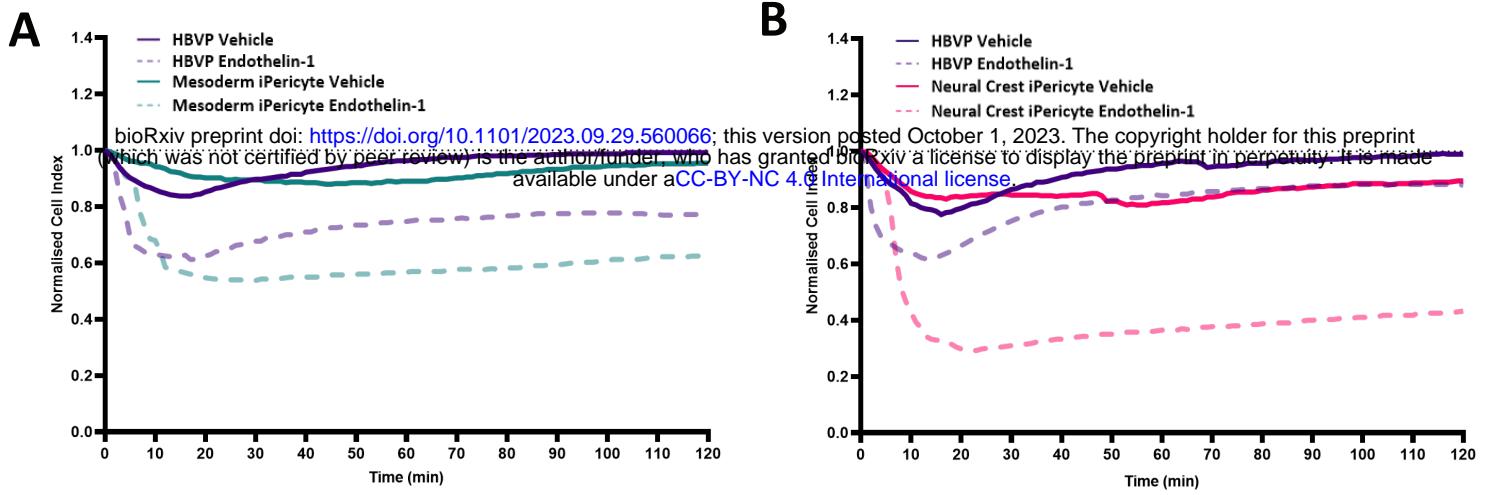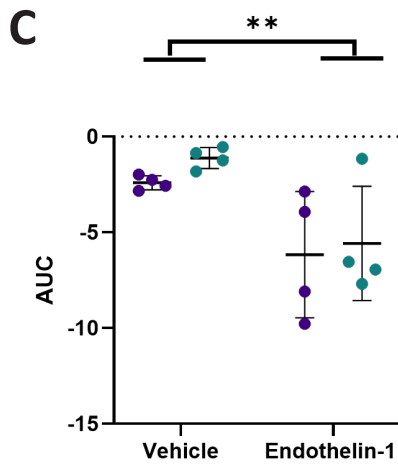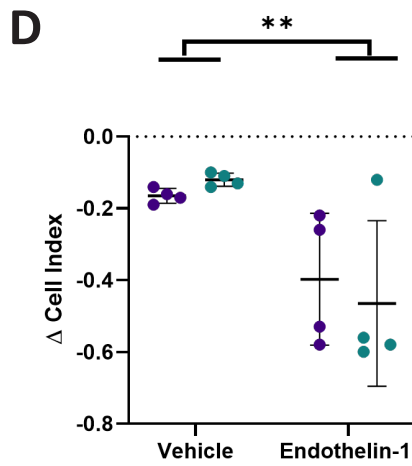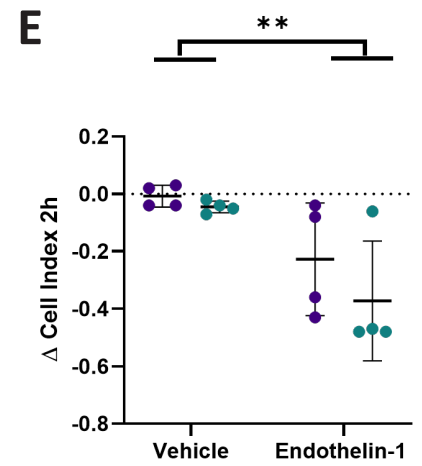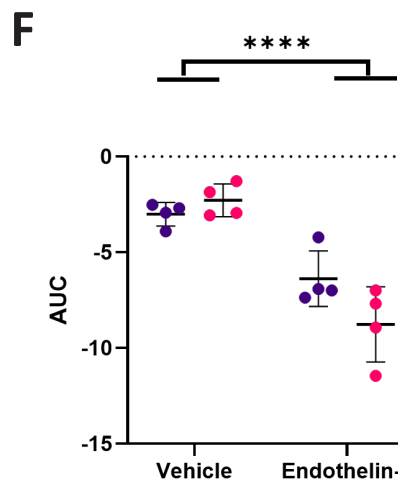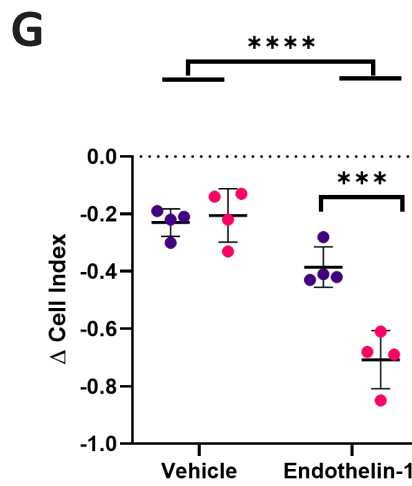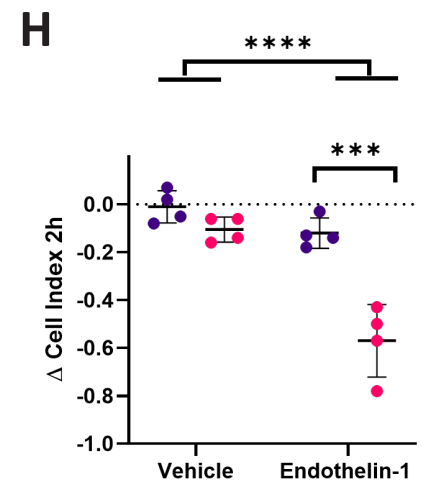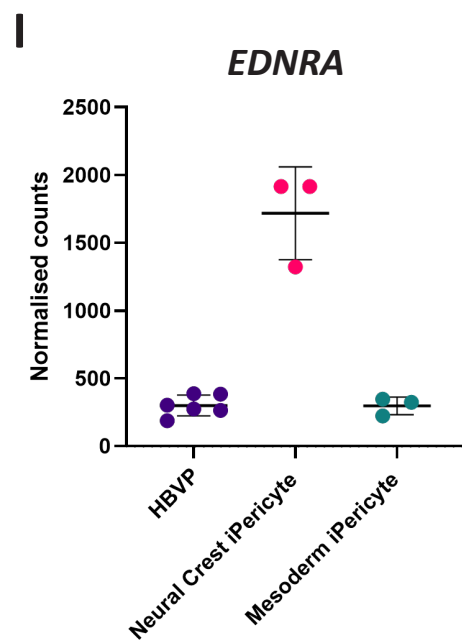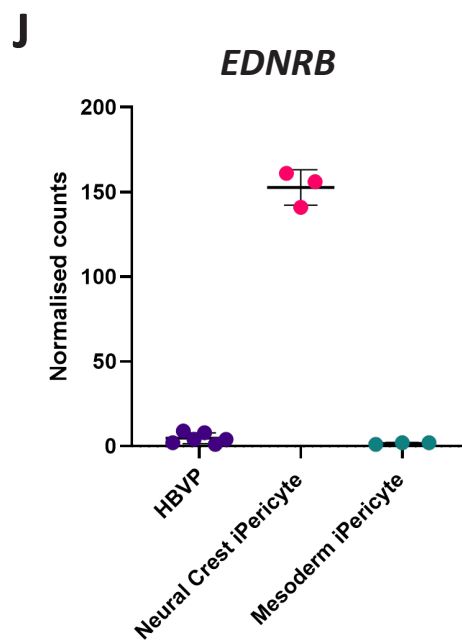

Key:

HBVP

Neural Crest iPericytes

Mesoderm iPericytes

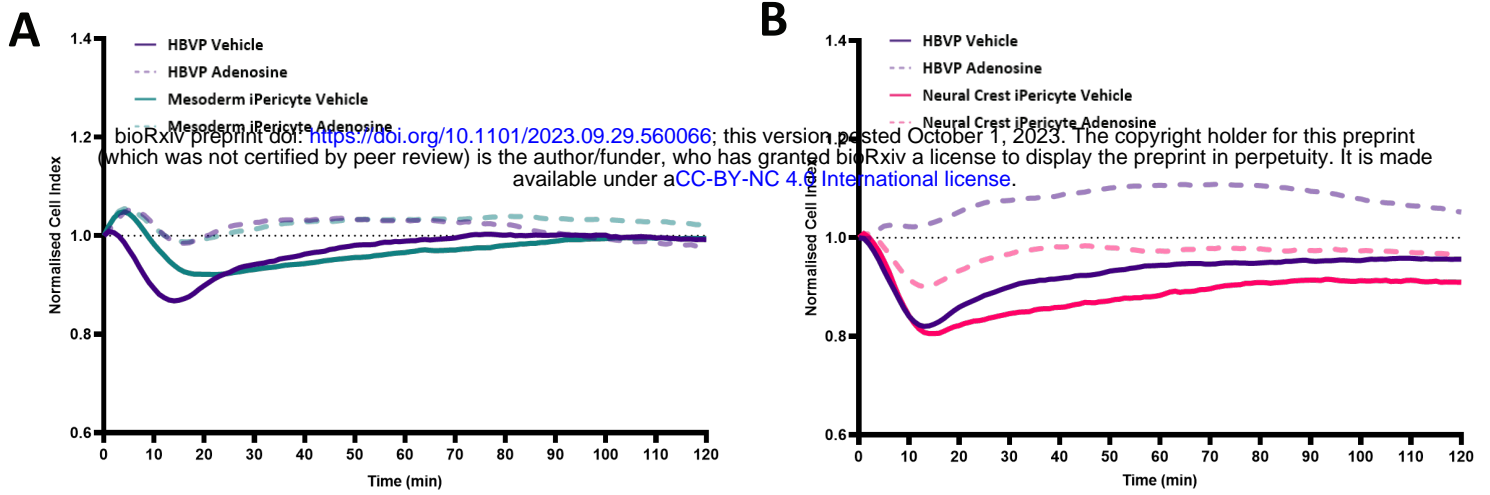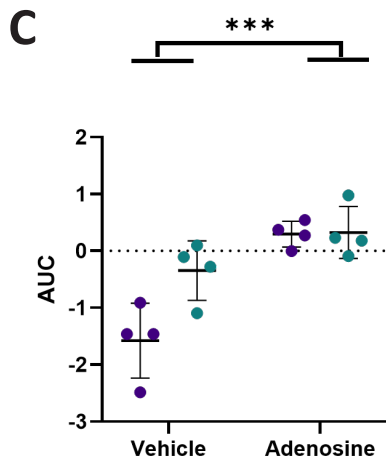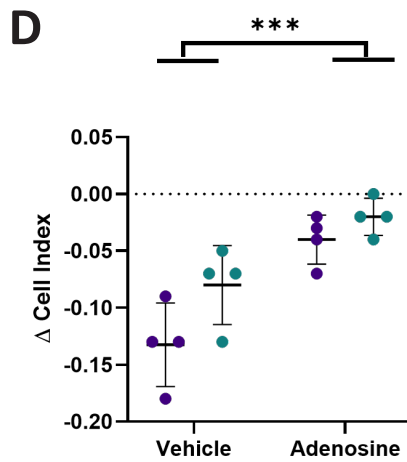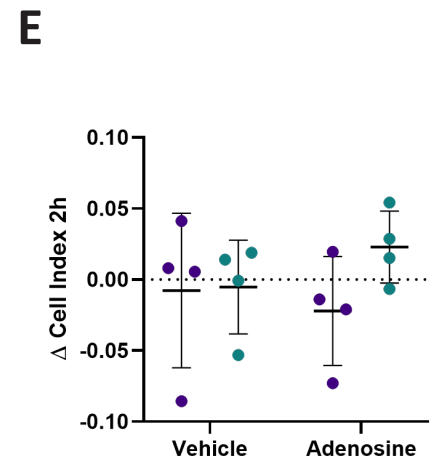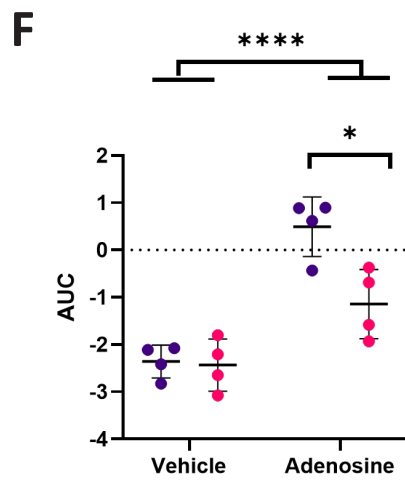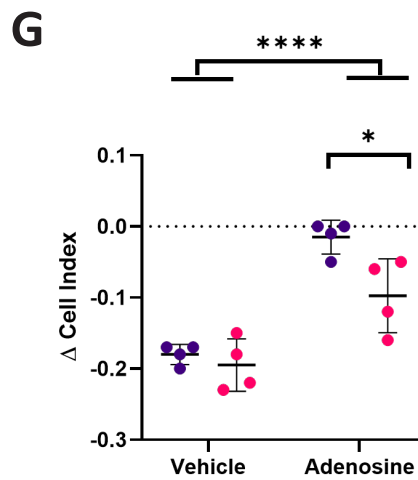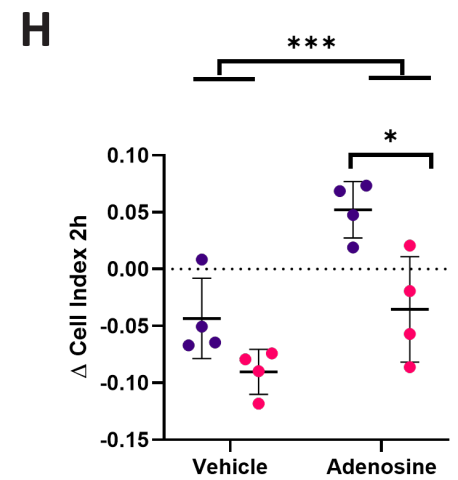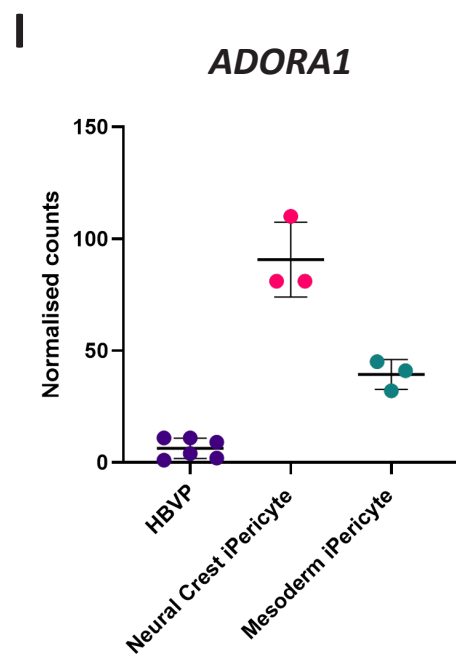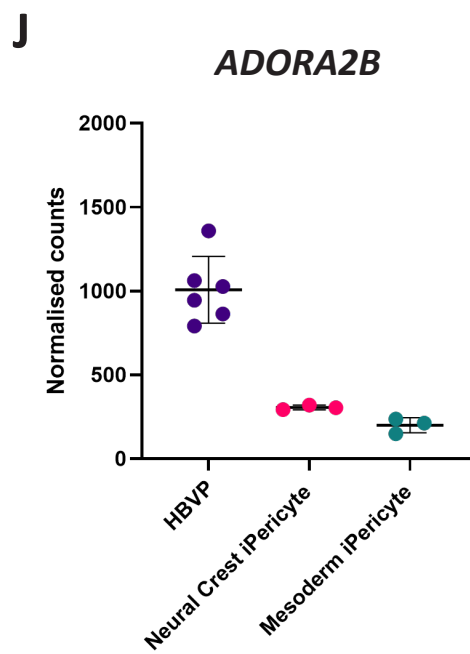

Key:

HBVP

Neural Crest iPericytes

Mesoderm iPericytes
